# Supplementary material for: Targeting DNA polymerase to DNA double-strand breaks reduces DNA deletion size and increases templated insertions generated by CRISPR/Cas9
Source: PubMed Central journal article supplement (PMC9023269; doi:10.1093/nar/gkac186), 2022-03-22
Supplement: gkac186_supplemental_file.pdf [file gkac186_supplemental_file.pdf]

**Targeting DNA Polymerase to DNA double-strand breaks reduces DNA deletion size and increases templated insertions generated by CRISPR/Cas9**

Kyung Yoo<sup>1</sup>, Manish Kumar Yadav<sup>1</sup>, Qianqian Song<sup>2</sup>, Anthony Atala<sup>1</sup>, Baisong Lu<sup>1\*</sup>

<sup>1</sup>Wake Forest Institute for Regenerative Medicine, Wake Forest University Health Sciences, Winston-Salem, North Carolina, 27101, United States of America

<sup>2</sup>Department of Cancer Biology, Wake Forest University Health Sciences, Winston-Salem, NC, 27157

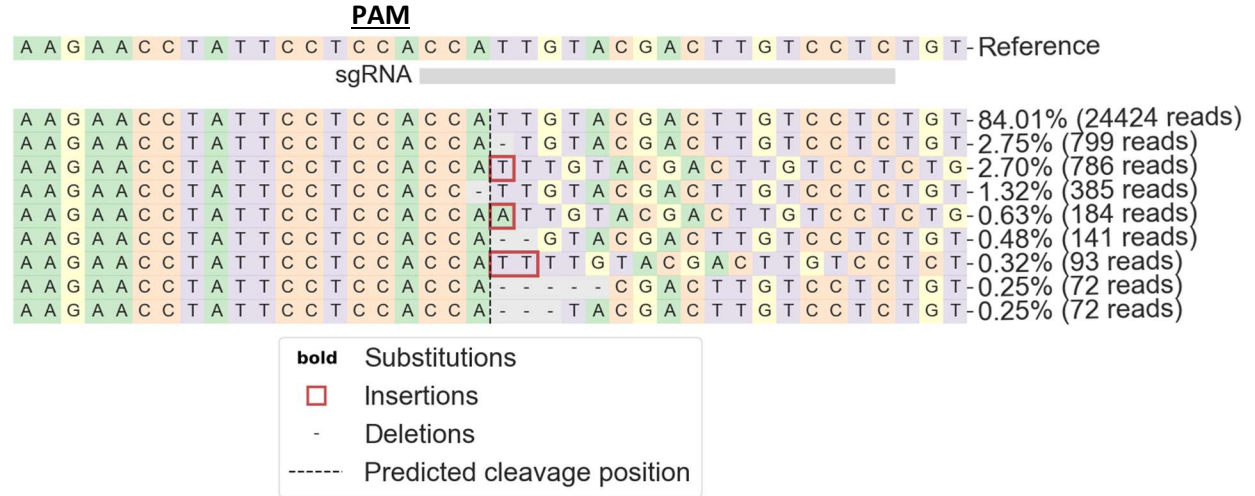

**Supplementary Figure S1. NGS analysis of the integrated target sequence in GFP-reporter cells treated with CLCN5 sgRNA and Cas9-pol.** Data were analyzed by CRISPResso2.

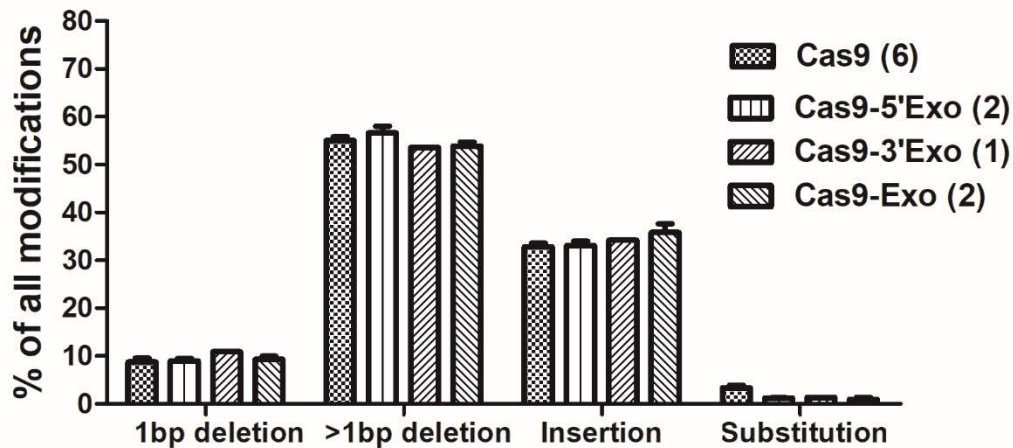

**Supplementary Figure S2. Cas9 and various exonuclease fusions had similar mutation profiles as Cas9.** Numbers in parentheses indicate replicate numbers. Data were analyzed by CRISPResso2.

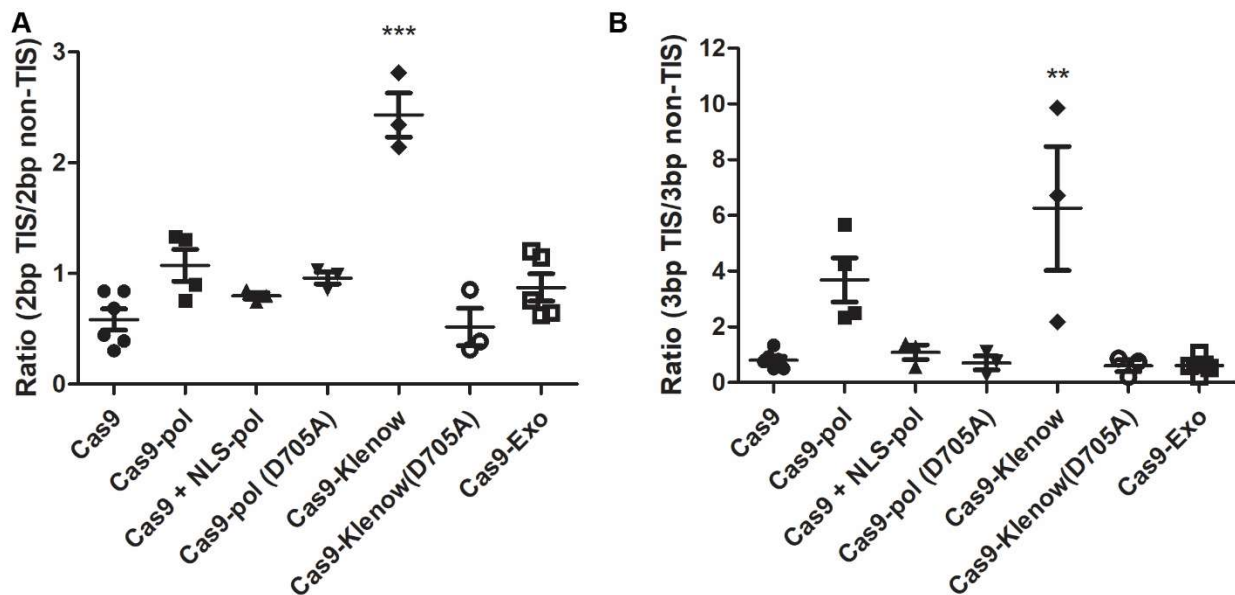

**Supplementary Figure S3. Effects of different pol I domains and mutants on 2-bp (A) and 3-bp (B) TIS.** The data for exo, 3' exo and 5' exo fusion proteins targeting *CLCN5* in HEK293T cells were pooled into one group. Each dot indicates one datum point. \*\* and \*\*\* indicate  $p < 0.05$  and  $p < 0.001$  compared with Cas9 group. Tukey's Multiple Comparison Test was performed following one-way ANOVA. Cas9-pol showed a trend of increase but did not reach statistical significance due to large intra group variation.

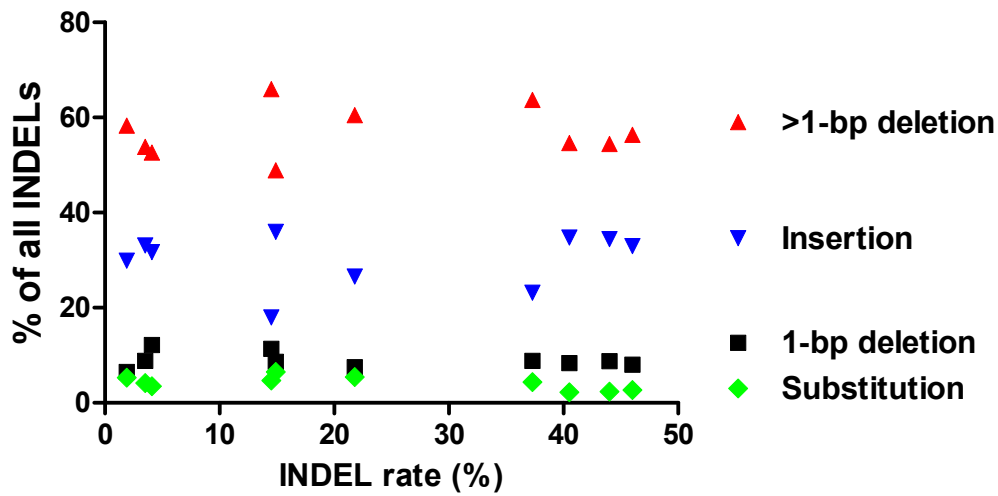

**Supplementary Figure S4. No effects of overall INDEL rates on the percentages of different mutation types.** Data were analyzed by CRISPResso2.

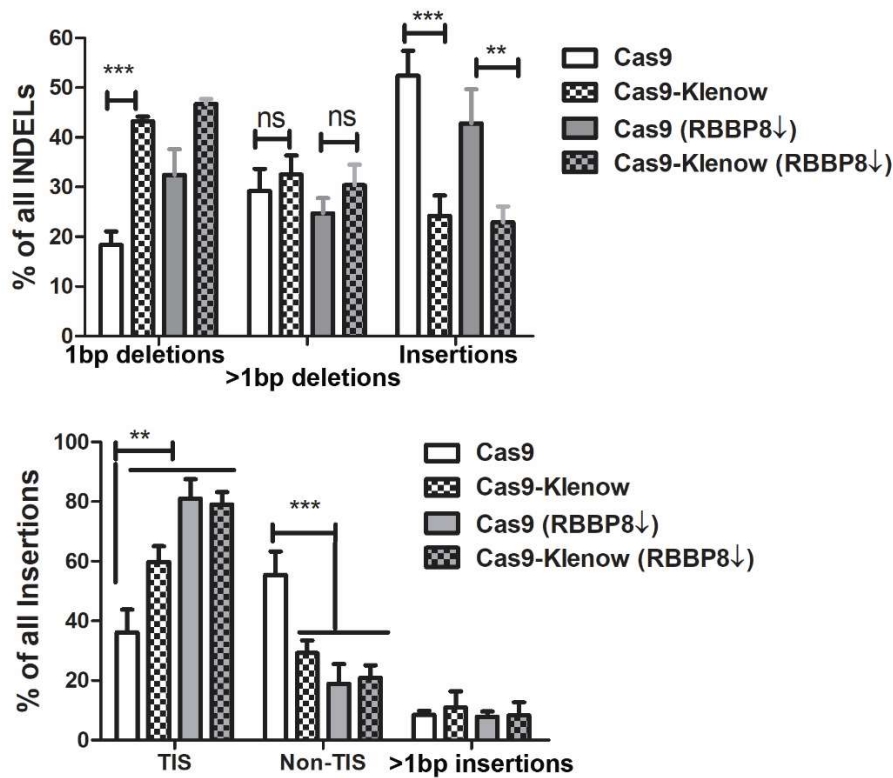

**Supplementary Figure S5. Effects of *RBBP8* Knockdown on *CLCN5* mutation profiles in IMR90 cells.** Top image: effects on deletions and overall insertions. Bottom image: Effects on 1-bp TIS and 1-bp non-TIS. Each group had 3 biological replicates. Two-way ANOVA was

followed by Bonferroni posttests. \*\* and \*\*\* indicate  $p < 0.01$  and  $p < 0.001$  between the indicated groups.

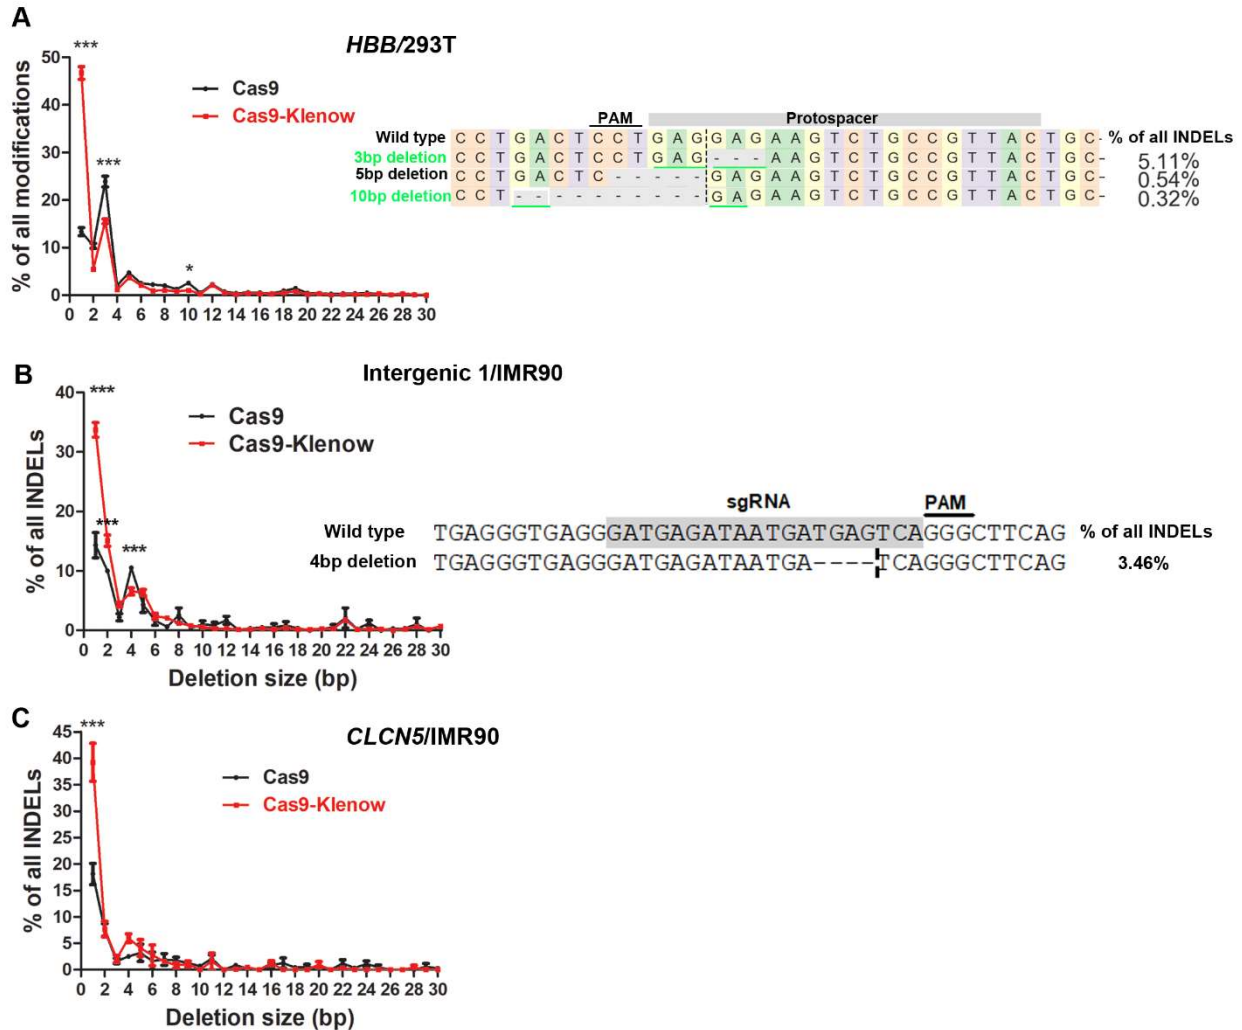

**Supplementary Figure S6. Deletions decreased by Cas9-Klenow and their sequences.** A. Targeting *HBB* in HEK293T cells. B. Targeting Intergenic 1 in IMR90 cells. C. Targeting *CLCN5* in IMR90 cells. The left images show the percentages of deletion sizes. The right images show the sequences of the most commonly observed deletions. No sequence could be listed for *CLCN5/IMR90* since no major deletion peaks were observed. The regions underlined with green lines indicate microhomology at the predicted cleavage site (vertical dashed lines). Two-way ANOVA was followed by Bonferroni posttests. \* and \*\*\* indicates  $p < 0.05$  and  $P < 0.001$  between the two groups.

Target
PAM

**HBB :**    GTAACGGCAGACTTCTCCTCAGG  
**HBD :**    TTGACAGCAGTCTTCTCCTCAGG  
**OT-4 :**    ATACTTAAGGACTTCTCCTCCAT  
**OT-5 :**    GGAGGGGCAGGCTTCTCCTCTGG  
**OT-8 :**    TCACAGGCAGACTTCTCCACGGG

**Supplementary Figure S7. Sequences of off-targets examined.** PAMs are underline. Red nucleotides are those of mismatch.

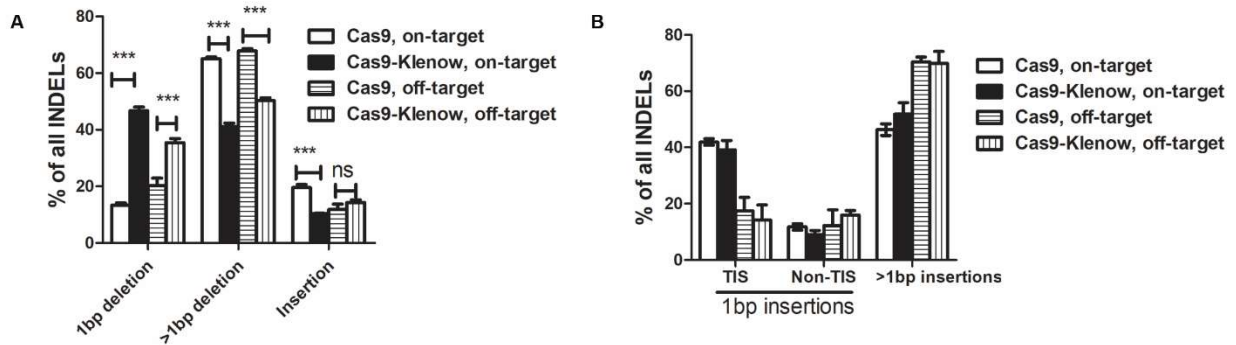

**Supplementary Figure S8. Effects of fusing Klenow fragment to Cas9 on the *HBB* on-target and *HBB* “off-target” site in HEK293T cells. **A.** Deletions and insertions. **B.** TIS and non-TIS. \*\*\* indicates  $P < 0.001$  between the two groups (Bonferroni posttests following two-way ANOVA).**

**Supplementary Table S1. Constructs**

| No. | Name                          | Purpose                                                                                                                                                                                                                                                                                                | Generation strategy                                                                                                                                                                                                                                                                                                                                                                                                                                                                                                                                                                                                                                                                                                                                                                                                                                                                                                                                                                                                                                                                                                                                                                     |
|-----|-------------------------------|--------------------------------------------------------------------------------------------------------------------------------------------------------------------------------------------------------------------------------------------------------------------------------------------------------|-----------------------------------------------------------------------------------------------------------------------------------------------------------------------------------------------------------------------------------------------------------------------------------------------------------------------------------------------------------------------------------------------------------------------------------------------------------------------------------------------------------------------------------------------------------------------------------------------------------------------------------------------------------------------------------------------------------------------------------------------------------------------------------------------------------------------------------------------------------------------------------------------------------------------------------------------------------------------------------------------------------------------------------------------------------------------------------------------------------------------------------------------------------------------------------------|
| 1   | pspCas9-POLI-Tetra-com vector | Vector plasmid for expressing spCas9-POLI fusion protein and sgRNA. There are two copies of HBB 3' UTR in the 3'UTR of spCas9-POLI to enhance expression. The Tetraloop of the sgRNA scaffold was replaced by com-patamer to enable Cas9 RNP encapsulation into viral capsids via com-COM interaction. | The DNA sequence of <i>E. coli</i> DNA POLI (encoded by POLA) was optimized for human and mouse expression as “GGATCCTCTGAGACACCAGGCACCTCCGAGTCTGCCACCCCTGA GGGAGGCAGCGGAGGCAGCGGCTCCGTGCAGATCCCACAGAAC CCCCTGATCCTGGTGGACGGCAGCTCCTACCTGTATCGGGCCTAC CACGCCCTTCCCACCTCTGACAAACTCCGCCGGAGAGCCAACCGG AGCCATGTATGGCGTGCTGAATATGCTGAGGAGCCTGATCATGCA GTACAAGCCTACACACGCCCGCGTGGTGTGTTGATGCCAAGGGCAA GACCTTCCGCGACGAGCTGTTTGAGCACTACAAGAGCCACAGGC CACCAATGCCTGACGATCTGAGGGCACAGATCGAGCCACTGCAC GCAATGGTGAAGGCCATGGGCCTGCCTCTGCTGGCCGTGAGCGG AGTGGAGGCCGACGATGTGATCGGCACACTGGCAAGGGAGGCAG AGAAGGCAGGCCGCCCAGTGCTGATCTCCACCGGCGACAAGGAT ATGGCCCAGCTGGTGACACCAAACATCACCTGATCAACACCATG ACAAATACCATCCTGGGCCCGAGGAGGTGGTGAATAAGTATGGC GTGCCTCCAGAGCTGATCATCGATTTCTGGCCCTGATGGGCGAC TTAGCGATAACATCCCTGGAGTGCCAGGAGTGGGAGAAAAGAC CGCACAGGCCCTGCTGCAGGGCCTGGGAGGCCTGGACACCCTGT ACGCCGAGCCAGAGAAGATCGCCGCGCTGTCCCTTAGGGGGCC AAGACAATGGCCGCAAGCTGGAGCAGAATAAGGAGGTGGCCTA CCTGTCTTATCAGCTGGCCACAATCAAGACCGACGTGGAGCTGGA GCTGACCTGCGAGCAGCTGGAGGTGCAGCAGCCTGCAGCAGAGG AGCTGTGGGCTGTTCAAGAAGTACGAGTTTAAGAGATGGACAG CCGATGTGGAGGCCGCAAGTGGCTGCAGGCAAAGGGAGCAA GCCAGCAGCAAAGCCACAGGAGACAAGCGTGGCAGACGAGGCAC |

| No. | Name | Purpose | Generation strategy                                                                                                                                                                                                                                                                                                                                                                                                                                                                                                                                                                                                                                                                                                                                                                                                                                                                                                                                                                                                                                                                                                                                                                                                                                                                                                                                                                                                                                                                                                                                                                                                                                                                                                                                                                                                                                                                                                                                                                                                                                                                                                                                                                                                                                                                                                                                                                                                                                                                                                                                                                                                                                                                                                                                                                                                                                                                                                                                                                                                                                                                                                                                                                                                                                                                                                                                                                                                                                                                                                                                                                                                                           |
|-----|------|---------|-----------------------------------------------------------------------------------------------------------------------------------------------------------------------------------------------------------------------------------------------------------------------------------------------------------------------------------------------------------------------------------------------------------------------------------------------------------------------------------------------------------------------------------------------------------------------------------------------------------------------------------------------------------------------------------------------------------------------------------------------------------------------------------------------------------------------------------------------------------------------------------------------------------------------------------------------------------------------------------------------------------------------------------------------------------------------------------------------------------------------------------------------------------------------------------------------------------------------------------------------------------------------------------------------------------------------------------------------------------------------------------------------------------------------------------------------------------------------------------------------------------------------------------------------------------------------------------------------------------------------------------------------------------------------------------------------------------------------------------------------------------------------------------------------------------------------------------------------------------------------------------------------------------------------------------------------------------------------------------------------------------------------------------------------------------------------------------------------------------------------------------------------------------------------------------------------------------------------------------------------------------------------------------------------------------------------------------------------------------------------------------------------------------------------------------------------------------------------------------------------------------------------------------------------------------------------------------------------------------------------------------------------------------------------------------------------------------------------------------------------------------------------------------------------------------------------------------------------------------------------------------------------------------------------------------------------------------------------------------------------------------------------------------------------------------------------------------------------------------------------------------------------------------------------------------------------------------------------------------------------------------------------------------------------------------------------------------------------------------------------------------------------------------------------------------------------------------------------------------------------------------------------------------------------------------------------------------------------------------------------------------------------|
|     |      |         | <p>CAGAGGTGACAGCCACCGTGATCTCCTACGATAACTATGTGACAA<br/> TCCTGGACGAGGAGACTGAAGGCCTGGATCGCCAAGCTGGAG<br/> AAGGCCCCCGTGTTCGCCTTTGATACAGAGACAGACAGCCTGGAT<br/> AACATCTCCGCCAATCTGGTGGCCCTGTCTTTCCGCAATCGAGCCT<br/> GGCGTGGCCGCCTATATCCAGTGGCCACGACTACCTGGATGC<br/> CCCCGACCAGATCAGCAGGGAGAGAGCCCTGGAGCTGCTGAAGC<br/> CTCTGCTGGAGGATGAGAAGGCCCTGAAGGTCGGCCAGAACCTG<br/> AAGTATGACAGGGGCATCCTGGCCAATTACGGCATCGAGCTGAGA<br/> GGCATCGCCTTTGACACCATGCTGGAGTCTTATATCCTGAATAGC<br/> GTGGCAGGCCGGCACGACATGGATTCCCTGGCCGAGAGGTGGCT<br/> GAAGCACAAGACAATCACCTTCGAGGAGATCGCCGGCAAGGGCA<br/> AGAACCAGCTGACCTTCAACCAGATCGCCCTGGAGGAGGCAGGC<br/> AGGTACGACAGCAGAGGACGACGATGTACCCTGCAGCTGCACCT<br/> GAAGATGTGGCCAGATCTGCAGAAGCACAAGGGCCCCCTGAACG<br/> TGTTCCGAGAAATATCGAGATGCCCTGGTGCCTGTGCTGAGCCGGA<br/> TCGAGCGCAACGGCGTGAAGATCGACCCTAAGGTGCTGCACAAT<br/> CACTCCGAGGAGCTGACCCTGAGACTGGCCGAGCTGGAGAGAA<br/> GGCCACGAGATCGCCGGCGAGGAGTTCAACCTGTCTCTACAA<br/> AGCAGCTGCAGACCATCCTGTTTGAGAAGCAGGGGCATCAAGCCCC<br/> TGAAGAAAACCCCTGGAGGAGCACCATCTACCAGCGAGGAGGTG<br/> CTGGAGGAGCTGGCCCTGGATTATCCCTGCCTAAAGTATGCTCG<br/> GAGTACCGGGGCTGGCCAAGCTGAAGTCTACATATACCGACAAG<br/> CTGCCCCCTGATGATCAACCCTAAGACAGGAAGGGTGCACACCAGC<br/> TACCACCAGGCAGTGACAGCAACCGGCCGCCTGAGCTCCACCGA<br/> TCCAAACCTGCAGAATATCCCCGTGAGGAATGAGGAGGGCAGGA<br/> GAATCAGACAGGCCCTTCATCGCCCCCGAGGATTATGTGATCGTGT<br/> CCGCCGACTACTCTCAGATCGAGCTGAGGATCATGGCCCACCTGT<br/> CCAGAGATAAGGGCCTGCTGACAGCCTTCGCCGAGGGCAAGGAC<br/> ATCCACAGGGCAACCGCAGCAGAGGTGTTTGGCCTGCCTCTGGA<br/> GACAGTGACCTCCGAGCAGCGGCCTCTGCCAAGGCCATCAACT<br/> TCGGCCTGATCTATGGCATGTCTGCCTTTGGCCTGGCCAGGCAGC<br/> TGAATATCCCTAGAAAGGAGGCCAGAAAGTACATGGACCTGTATT<br/> TCGAGAGGTACCCAGGCGTGCTGGAGTACATGGAGAGGACAAGG<br/> GCACAGGCAAAGGAGCAGGGCTATGTGGAGACACTGGATGCGAG<br/> GAGACTGTACCTGCCAGACATCAAGTCTAGCAACGGAGCAAGGA<br/> GGGCAGCAGCAGAGAGGGGCCCATCAATGCCCCCATGCAGGG<br/> CACAGCCCGGATATCATCAAGAGAGCCATGATCGCAGTGGACG<br/> CATGGCTGCAGGCAGAGCAGCCAAGGGTGAGAATGATCATGCGAG<br/> GTGCACGATGAGCTGGTGTGTTGAGGTGCACAAGGACGATGTGGA<br/> CGCCGTGGCCAAGCAGATCCACCAGCTGATGGAGAAGTGTACCA<br/> GGCTGGATGTGCCACTGCTGGTGGAAAGTGGGCAGCGGAGAGAAT<br/> TGGGACCAGGCCACTGAGGATCC” and was inserted into BamH1<br/> site of pspCas9-Tetra-com vector. The peptide sequence is:<br/> MDYKDHGDYKDHIDIDYKDDDDKMAPKKRKRKVIHGVPAADKKYSI<br/> GLDIGTNSVGVAVITDEYKVPKFKVLGNDRHSIKKNIIGALLFDS<br/> GETAEATRLKRTARRRYTRRKNRICYLQEIFSNEMAKVDDSFHRL<br/> ESFLVEEDKHERHPIFGNIVDEVAYHEKYPTIYHLRKLVDSTDKADL<br/> RLIYLALAHMIKFRGHFLIEGDLNPDNSDVKLFIQLVQTYNQLFEENPI<br/> NASGVDAKAILSARLSKSRLENLIAQLPGEKKNLFGNLIASLGLTP<br/> NFKSNFDLAEDAKLQLSKDYYDDLDNLQAIGDQYADFLAAKNLSD<br/> AILLSDILRVNTEITKAPLSASMIKRYDEHHQDLTLLKALVRQQLPEKYK<br/> EIFFDQSKNGYAGYIDGGASQEEFYKFIKPILEKMDGTEELLVKNLRE<br/> DLLRKQRTFDNGSIPHQIHLGELHAILRRQEDFYFPLKDNREKIEKILTF<br/> RIPYYVGPLARGNSRFAMTRKSEETITPWNFEVVDKGASAQSFIE<br/> RMTNFDKNLPNEKVLPHSLLYEYFTVYNELTKVKYVTEGMRKPAFL<br/> SGEQKKAIVDLLFKTNRKVTVKQLKEDYFKKIECFDSVEISGVEDRFN<br/> ASLGTYHDLKIIKDKDFLDNEENEDILEDIVLTLTLFEDREMIEERLKY<br/> AHLFDDKVMKQLKRRRYTGWGRLSRKLINGIRDKQSGKTILDFLKS<br/> GFANRNFMQLIHDDSLTFKEDIQKAQVSGQDLSLHEHIANLAGSPA<br/> KGILQTVKVVDELVKVMGRHKPENIVIEMARENQTTQKGGQKNSRERM<br/> KRIEIGIKELGSQILKEHPVENTQLQNEKLYLYLQNGRDMYVDQELD<br/> INRLSDYDVDHIVPQSFLKDDSIDNKVLRSDKNRGSNDNVPSEEVVK<br/> RMKNYWRQLLNAKLITQRKFDNLTKAERGGLSELDKAGFIKRLVET<br/> RQITKHVAQILDSRMNTKYDENDKLIREVKVITLKSCLVSDFRKDFQY<br/> KVREINNYHHAHDAYLNAVVGTAIIKYPKLESEFVYGDYKVYDVRK<br/> MIAKSEQEIGKATAKYFFYSNIMNFFKTEITLANGEIRKRLIETNGETG<br/> EIVWDKGRDFATVRKVLSPQVNVKTEVQTGGFSKESILPKRNSD<br/> KLIARKKDWDPKYGFDSPVAVSVLVVAKVEKGSKSLKSVKELL</p> |



| No. | Name                                 | Purpose                                                                                        | Generation strategy                                                                                                                                                                                                                                                                                                                                                                                                                                                                                                                                                                                                                                                                                                                                                                                                                                                                                                                                                                                                                                                                                                                                                                                                                                                                                                                                                                                                                                  |
|-----|--------------------------------------|------------------------------------------------------------------------------------------------|------------------------------------------------------------------------------------------------------------------------------------------------------------------------------------------------------------------------------------------------------------------------------------------------------------------------------------------------------------------------------------------------------------------------------------------------------------------------------------------------------------------------------------------------------------------------------------------------------------------------------------------------------------------------------------------------------------------------------------------------------------------------------------------------------------------------------------------------------------------------------------------------------------------------------------------------------------------------------------------------------------------------------------------------------------------------------------------------------------------------------------------------------------------------------------------------------------------------------------------------------------------------------------------------------------------------------------------------------------------------------------------------------------------------------------------------------|
|     |                                      |                                                                                                | <p>GITIMERSSFEKNPIDFLEAKGYKEVKKDLIIKLPKYSLFELENGRKRML<br/> ASAGELQKGNELALPSKYVNFLLYASHYEKLGSPEDNEQKQLFVEQ<br/> HKHYLDEIIEQISEFSKRVLADANLDKVL SAYNKHRDKPIREQAENIIHL<br/> FTLNLGAPAAFYFDTTIDRKRYTSTKEVLDTLIHQSIITGLYETRIDL<br/> SQLGGDKRPAATKKAGQAKKKKGSSETPGTSESATPEGGSGGSGS<br/> VQIPQNPLILVDGSSYLYRAYHAFPLTNSAGEPTGAMYGVNLMLRSL<br/> IMQYKPTHAAVFDAGKTFRDELFEHYKSHRPPMPDDLRAQIEPLH<br/> AMVKAMGLPLLAVSGVEADDVIGTLAREAEKAGRPVLISTGDKDMAQ<br/> LVTNITLINTMTNTILGPEEVVNKYGVPELIIDFLALMGDSSDNIPIGV<br/> PGVGEKTAQALLQGLGGLDTLYAEPEKIAGLSFRGAKTMAAKLEQNK<br/> EVALYSYQLATIKTDVELELTCEQLEVVQPPAAEELLGLFKKYEFRWT<br/> ADVEAGKWLQAKGAKPAKPQETSVADEAPEVTATVISYDNYVTILD<br/> EETLKAWIAKLEKAPVFAFDTETDSDLNISANLVGLSFAIEPGVAAIYIPV<br/> AHDYLDAPDQISRERALELLKPLLEDEKALKVGNLKYDRGILANYGIE<br/> LRGIAFDTMLESYILNSVAGRHDMSLAERWLKHKITITFEEIAGKGN<br/> QLTFNQIALEEAGRYAAEDADVTQLHLKMWPDQKHKGPLNVFENI<br/> EMPLVPVLSRIERNVGVKIDPKVLHNSHSEELTLRLAELEKKAHEIAGEEF<br/> NLSSTKQLQTLFEKQGIKPLKKTTPGGAPSTSEEVLEELALDYPLPKVIL<br/> EYRGLAKLKSTYTDKLP.LMINPKTGRVHTSYHQAVTATGRLSSTDPNL<br/> QNIPVRNEEGRRIQAFIAPEDYVIVSADYSQIELRIMAHLSRDKGLLT<br/> AFAEGKDIHRATAAEVFGLEPLTVTSEQRRSAKAINFGLIYGM5AFL<br/> ARQLNIPRKEAQKYMDFERYPGVLEYMERTRAQAKEQGYVETLD<br/> GRRLYL.PDIKSSNGARRAAAERAANAPMQGTAADIKRAMIAVDLAWL<br/> QAEQPRVRMIMQVHDELVEVHKDDVDVAQKIQHQLMENCTRLDVP<br/> LLVEVSGGENWDQAH (Color Key: Cas9-linker-Polymerase)</p>                                                     |
| 2   | pspCas9-poli-Tetra-com-clcn5-sp-g1   | Vector plasmid for expressing spCas9-poll fusion protein and sgRNA targeting human CLCN5 gene. | <p>The annealed product of hCLCN5-sp-g1-F (ACCGGAGGACAAGTCGTACAATGG) and hCLCN5-sp-g1-R (AAACCCATTGTACGACTTGTCTC) was inserted between the BbsI sites of pspCas9-POLI-Tetra-com vector by T4 DNA ligase.</p>                                                                                                                                                                                                                                                                                                                                                                                                                                                                                                                                                                                                                                                                                                                                                                                                                                                                                                                                                                                                                                                                                                                                                                                                                                         |
| 3   | pspCas9-Klenow-Tetra-com-CLCN5-sp-g1 | Plasmid for expressing spCas9-Klenow fusion protein and sgRNA targeting human CLCN5 gene.      | <p>Use pspCas9-POLI-tetra-com-hCLCN5-sp-g1 as the template and Klenow-F (GTCTGCCACCCCTGAGGGAGGAGCACCAGAGGTGACAGCCAC) and Klenow-R (TTGTGCAGCACCTTAGGGTTCG) as the primers to amplify a 735 bp fragment. This DNA was inserted between the two Bsu36I sites of pspCas9-POLI-tetra-com-hCLCN5-sp-g1 by Infusion reaction.</p> <p>The end result is the removal of the DNA coding for the 5' exonuclease activity of E. coli POLI. Nucleic acid sequence:</p> <p>ATGGACTATAAGGACCACGACGGAGACTACAAGGATCATGATATT<br/> GATTACAAAGACGATGACGATAAGATGGCCCCAAAGAAGAAGCGG<br/> AAGGTCGGTATCCACGGAGTCCCAGCAGCCGACAAGAAGTACAG<br/> CATCGGCCTGGACATCGGCACCAACTCTGTGGGCTGGGCCGTGA<br/> TCACCGACGAGTACAAGGTGCCAGCAAGAAATCAAGGTGCTGG<br/> GCAACACCGACCGGCACAGCATCAAGAAGAACCTGATCGGAGCC<br/> CTGCTGTTGACAGCGGCGAAACAGCCGAGGCCACCCGGCTGAA<br/> GAGAACCGCCAGAAGAAGATACACCAGACGGAAGAACCAGGATCT<br/> GCTATCTGCAAGAGATCTTCAGCAACGAGATGGCCAAAGGTGGACG<br/> ACAGCTTCTCCACAGACTGGAAGAGTCTTCTGTTGGAAGAGG<br/> ATAAGAAGCACGAGCGGCACCCCATCTTCGGCAACATCGTGGAC<br/> GAGGTGGCCTACCACGAGAAGTACCCACCATCTACCACCTGAGA<br/> AAGAACTGGTGGACAGCAGCAGCAGCAGCAGCAGCAGCAGCAGCAGC<br/> CTATCTGGCCCTGGCCACATGATCAAGTTCGGGGCCACTGCT<br/> GATCGAGGGCGACCTGAACCCGACAACAGCGACGTGGACAAGC<br/> TGTTATCCAGCTGGTGCAGACCTACAACCAGCTGTTCCGAGGAAA<br/> ACCCCATCAACGCCAGCGGCGTGGACGCCAAGGCCATCCTGTCT<br/> GCCAGACTGAGCAAGAGCAGACGGCTGGAAAATCTGATCGCCCA<br/> GCTGCCCGGCGAGAAGAAGAATGGCCTGTTCCGAAACCTGATTG</p> |

| No. | Name | Purpose | Generation strategy                                                                                                                                                                                                                                                                                                                                                                                                                                                                                                                                                                                                                                                                                                                                                                                                                                                                                                                                                                                                                                                                                                                                                                                                                                                                                                                                                                                                                                                                                                                                                                                                                                                                                                                                                                                                                                                                                                                                                                                                                                                                                                                                                                                                                                                                                                                                                                                                                                                                                                                                                                                                                                                                                                                                                                                                                                                                                                                                                                                                                                                                                                                                                                                                                                                                                                                                                                                                                                                                                                   |
|-----|------|---------|-----------------------------------------------------------------------------------------------------------------------------------------------------------------------------------------------------------------------------------------------------------------------------------------------------------------------------------------------------------------------------------------------------------------------------------------------------------------------------------------------------------------------------------------------------------------------------------------------------------------------------------------------------------------------------------------------------------------------------------------------------------------------------------------------------------------------------------------------------------------------------------------------------------------------------------------------------------------------------------------------------------------------------------------------------------------------------------------------------------------------------------------------------------------------------------------------------------------------------------------------------------------------------------------------------------------------------------------------------------------------------------------------------------------------------------------------------------------------------------------------------------------------------------------------------------------------------------------------------------------------------------------------------------------------------------------------------------------------------------------------------------------------------------------------------------------------------------------------------------------------------------------------------------------------------------------------------------------------------------------------------------------------------------------------------------------------------------------------------------------------------------------------------------------------------------------------------------------------------------------------------------------------------------------------------------------------------------------------------------------------------------------------------------------------------------------------------------------------------------------------------------------------------------------------------------------------------------------------------------------------------------------------------------------------------------------------------------------------------------------------------------------------------------------------------------------------------------------------------------------------------------------------------------------------------------------------------------------------------------------------------------------------------------------------------------------------------------------------------------------------------------------------------------------------------------------------------------------------------------------------------------------------------------------------------------------------------------------------------------------------------------------------------------------------------------------------------------------------------------------------------------------------|
|     |      |         | <p>CCCTGAGCCTGGGCTGACCCCAACTTCAAGACAACTTCGACC<br/> TGGCCGAGGATGCCAACTGCAGCTGAGCAAGGACACCTACGAC<br/> GACGACCTGGACAACCTGCTGGCCAGATCGGCCAGCAGTACGC<br/> CGACCTGTTTCTGGCCGCAAGAACCCTGTCCGACGCCATCCTGCT<br/> GAGCGACATCCTGAGAGTGAACACCGAGATCACCAAGGCCCC<br/> TGAGCGCCTCTATGATCAAGAGATACGACGAGCACCACCAGGAC<br/> TGACCCTGCTGAAAGCTCTCGTGCGGCAGCAGCTGCCTGAGAAG<br/> TACAAAGAGATTTTCTCGACCAGAGCAAGAACGGCTACGCCGGC<br/> TACATTGACGGCGGAGCCAGCCAGGAAGGTTCTACAAGTTCATC<br/> AAGCCATCCTGAAAAGATGGACGGCACCGAGGAAGTCTCGT<br/> GAAGCTGAACAGAGAGGACCTGCTGCGGAAGCAGCGGACCTTCG<br/> ACAACGGCAGCATCCCCACCAGATCCACCTGGGAGAGCTGCAC<br/> GCCATTCTGCGGGCGGAGGAAGATTTTTACCCATTCTGAAGGAC<br/> AACCGGAAAAGATCGAGAAGATCCTGACCTCCGCATCCCCTAC<br/> TACGTGGGCCCTTGGCCAGGGGAAACAGCAGATTCCGCTGGAT<br/> GACCAGAAAGAGCGAGGAAACCATCACCCCTGGAAGTTCGAGG<br/> AAGTGGTGGACAAGGGCGCTTCCGCCAGAGCTTCCAGGAGCG<br/> ATGACCAACTTCGATAAGAACCTGCCAACGAGAAGGTGCTGCC<br/> AAGCACAGCCTGCTGTACGAGTACTTACCGTGTATAACGAGCTG<br/> ACCAAAGTGAATACGTGACCGAGGGAATGAGAAAGCCCGCTTC<br/> CTGAGCGGCGAGCAGAAAAAGGCCATCGTGGACCTGCTGTTCAA<br/> GACCAACCGGAAAAGTACCGTGAAGCAGCTGAAAGAGGACTACT<br/> CAAGAAAAATCGAGTGTTCGACTCCGTGGAATCTCCGGCGTGG<br/> AGATCGGTTCAACGCCTCCCTGGGCACATACCACGATCTGCTGAA<br/> AATTATCAAGGACAAGGACTTCTGGACAATGAGGAAAACGAGGA<br/> CATTCTGGAAGATATCGTGCTGACCTGACACTGTTTGAGGACAG<br/> AGAGATGATCGAGGAACGGCTGAAAACCTATGCCACCTGTTGGA<br/> CGACAAAGTGATGAAGCAGCTGAAGCGGGCGGAGATACACCGGT<br/> GGGCAGGCTGAGCCGGAAGCTGATCAACGGCATCCGGGACAA<br/> GCAGTCCGGCAAGACAATCCTGGATTTCCTGAAGTCCGACGGCT<br/> CGCCAACAGAACTTCATGCAGCTGATCCACGACGACAGCCTGAC<br/> CTTTAAAGAGGACATCCAGAAAGCCAGGTGTCCGGCCAGGGCG<br/> ATAGCCTGCACGAGCACATTGCCAATCTGGCCGGCAGCCCCGCC<br/> ATTAAGAAGGGCATCCTGCAGACAGTGAAGGTGGTGGACAGGCT<br/> CGTGAAGTGATGGGCCGGCACAAGCCCCGAGAATCGTGATCG<br/> AAATGGCCAGAGAGAACCAGACCACCCAGAAGGGACAGAAGAAC<br/> AGCCGCGAGAGAATGAAGCGGATCGAAGAGGGGCATCAAAGAGCT<br/> GGCAGCCAGATCCTGAAAGAACACCCCGTGGAAAAACCCAGC<br/> TGCAGAACGAGAAGCTGTACCTGTACTACCTGCAGAATGGGCCG<br/> GATATGTACGTGGACCAGGAAGTGGACATCAACCGGTGTCCGAC<br/> TACGATGTGGACCATATCGTGCCCTCAGAGCTTTCTGAAGGACGAC<br/> TCCATCGACAACAAGGTGCTGACCAGAAGCGACAAGAACCAGG<br/> CAAGAGCGACAACCTGCCCCTCCGAAGAGGTCTGGAAGAAGTGA<br/> AGAACTACTGGCGGACGCTGCTGAACGCCAAGCTGATTACCCAGA<br/> GAAAGTTCGACAATCTGACCAAGGCCGAGAGAGGGCGGCTGAGC<br/> GAACTGGATAAAGCCGGCTTCATCAAGAGACAGCTGGTGGAAAC<br/> CCGGCAGATCACAAGCACGTGGCACAGATCCTGGACTCCCGGA<br/> TGAACACTAAGTACGACGAGAATGACAAGCTGATCCGGGAAGTGA<br/> AAGTGATCACCTGAAGTCCAAGCTGGTGTCCGATTTCCGGAAGG<br/> ATTTCCAGTTTTACAAAGTGCAGGAGATCAACAATACCACCACGC<br/> CCACGACGCTACCTGAACGCCGTGCTGGGAACCGCCCTGATCA<br/> AAAAGTACCCTAAGCTGGAAAGCGAGTTGCTGTACGGCGACTACA<br/> AGGTGTACGACGTGCGGAAGATGATCGCCAAGAGCGAGCAGGAA<br/> ATCGGCAAGGCTACCGCAAGTACTTCTTCTACAGCAACATCATG<br/> AATTTTTCAAGACCGAGATTACCCTGGCCAACGGCGAGATCCGG<br/> AAGCGGCTCTGATCGAGACAAACGGCGAAACCGGGGAGATCGT<br/> GTGGGATAAGGGCCGGGATTTGCCACCGTGCAGAAAGTGTGA<br/> GCATGCCCAAGTGAATATCGTGAAGAAAGACCGAGGTGCAGACAG<br/> GCGGCTTCAGCAAAGAGTCTATCCTGCCAAGAGGAACAGCGATA<br/> AGCTGATCGCCAGAAAGAAGGACTGGGACCCTAAGAAGTACGGC<br/> GGCTTCGACAGCCCCACCGTGGCCTATTCTGTGCTGGTGGTGGC<br/> CAAAGTGGAAAAGGGCAAGTCCAAGAACTGAAGAGTGTGAAGA<br/> GCTGCTGGGGATCACCATCATGGAAGAAGCAGCTTCGAGAAGAA<br/> TCCCATCGACTTTCTGGAAGCCAAGGGCTACAAAGAAGTGAAGAA<br/> GGACCTGATCATCAAGCTGCCTAAGTACTCCCTGTTTCGAGCTGGA<br/> AAACGGCCGGAAGAGAATGCTGGCCTCTGCCGGCAACTGCAGA<br/> AGGGAAACGAACTGGCCCTGCCCTCCAAATATGTGAAGTTCCTGT<br/> ACCTGGCCAGCCACTATGAGAAGCTGAAGGGCTCCCCGAGGAT</p> |



| No. | Name | Purpose | Generation strategy                                                                                                                                                                                                                                                                                                                                                                                                                                                                                                                                                                                                                                                                                                                                                                                                                                                                                                                                                                                                                                                                                                                                                                                                                                                                                                                                                                                                                                                                                                                                                                                                                                                                                                                                                                                                                                                                                                                                                                                                                                                                                                                                                                                                                                                                                                                                                                                                                                                                                                                                                                                                                                                                                                                                                                                                                                                                                                                                                                                                                                                                                                                                                                                                                                                                                                                                                                                                                                                                                                                                                                                |
|-----|------|---------|----------------------------------------------------------------------------------------------------------------------------------------------------------------------------------------------------------------------------------------------------------------------------------------------------------------------------------------------------------------------------------------------------------------------------------------------------------------------------------------------------------------------------------------------------------------------------------------------------------------------------------------------------------------------------------------------------------------------------------------------------------------------------------------------------------------------------------------------------------------------------------------------------------------------------------------------------------------------------------------------------------------------------------------------------------------------------------------------------------------------------------------------------------------------------------------------------------------------------------------------------------------------------------------------------------------------------------------------------------------------------------------------------------------------------------------------------------------------------------------------------------------------------------------------------------------------------------------------------------------------------------------------------------------------------------------------------------------------------------------------------------------------------------------------------------------------------------------------------------------------------------------------------------------------------------------------------------------------------------------------------------------------------------------------------------------------------------------------------------------------------------------------------------------------------------------------------------------------------------------------------------------------------------------------------------------------------------------------------------------------------------------------------------------------------------------------------------------------------------------------------------------------------------------------------------------------------------------------------------------------------------------------------------------------------------------------------------------------------------------------------------------------------------------------------------------------------------------------------------------------------------------------------------------------------------------------------------------------------------------------------------------------------------------------------------------------------------------------------------------------------------------------------------------------------------------------------------------------------------------------------------------------------------------------------------------------------------------------------------------------------------------------------------------------------------------------------------------------------------------------------------------------------------------------------------------------------------------------------|
|     |      |         | <p>AATGAGCAGAAAACAGCTGTTTGTGGAACAGCACAAGCACTACCTG<br/> GACGAGATCATCGAGCAGATCAGCGAGTTCTCCAAGAGAGTGATC<br/> CTGGCCGACGCTAATCTGGACAAAGTGTGTCCGCCTACAACAAG<br/> CACCGGGATAAGCCCATCAGAGAGCAGGCCGAGAATATCATCCA<br/> CCTGTTTACCCTGACCAATCTGGGAGCCCCTGCCGCCTTCAAGTA<br/> CTTTGACACCACCATCGACCCGAAGAGGTACACCAGCACCAAAGA<br/> GGTGCTGGACGCCACCCTGATCCACCAGAGCATCACCCGCCCTGT<br/> ACGAGACACGGATCGACCTGTCTCAGCTGGGAGGCCGACAAAAGG<br/> CCGGCGGCCACGAAAAAGGCCGGccaggcaaaaaagaaaaaggGATCC<br/> TCTGAGACACCAGGCACCTCCGAGTCTGCCACCCTGAGGGAGG<br/> AGCACCAGAGGTGACAGCCACCGTGTCTCCTACGATAACTATGT<br/> GACAATCCTGGACGAGGAGACACTGAAGGCCTGGATCGCCAAGC<br/> TGGAGAAGGCCCCCGTGTTCGCCTTGTACAGAGACAGACAGCC<br/> TGGATAACATCTCCGCCAATCTGGTGGGCCTGTCTTTCGCCATCG<br/> AGCCTGGCGTGGCCGCCTATATCCCAGTGGCCACGACTACCTG<br/> GATGCCCCCGACCAGATCAGCAGGGAGAGAGCCCTGGAGCTGTCT<br/> GAAGCTCTGTGGAGGATGAGAAGGCCCTGAAGTCCGGCCAGA<br/> ACCTGAAGTATGACAGGGGCATCCTGGCCAATTACGGCATCGAGC<br/> TGAGAGGCATCGCCTTGGACACCATGCTGGAGTCTTATATCCTGA<br/> ATAGCGTGGCAGGCCGGCACGACATGGATTCCTGGCCGAGAGG<br/> TGGCTGAAGCACAAAGACAATCACCTTCGAGGAGATCGCCGAA<br/> GGGCAAGAACCAGCTGACCTTCAACCAGATCGCCCTGGAGGAGG<br/> CAGGCAGGTACGCAGCAGAGGACGCAGATGTGACCCTGCAGCTG<br/> CACCTGAAGATGTGGCCAGATCTGCAGAAGCACAAGGGCCCCCT<br/> GAACGTCTTTGAGAATATCGAGATGCCCTGGTGCCTGTGCTGAG<br/> CCGGATCGAGCGCAACGGCGTGAAGATCGACCTAAGGTGCTGC<br/> ACAATCACTCCGAGGAGCTGACCCTGAGACTGGCCGAGCTGGAG<br/> AAGAAGGCCACGAGATCGCCGGCGAGGAGTTCAACCTGTCTCT<br/> TACAAAGCAGCTGCAGACCATCCTGTTTGAAGAAGCAGGCCATCA<br/> GCCCCGAAGAAAAACCCCTGGAGGAGCACCATCTACCAGCGAGG<br/> AGGTGCTGGAGGAGCTGGCCCTGGATTATCCCCTGCCTAAAGTGA<br/> TCCTGGAGTACCGGGGCCCTGGCCAAGCTGAAGTCTACATATACCG<br/> ACAAGCTGCCCTGATGATCAACCCTAAGACAGGCCGGGTGCACA<br/> CCAGCTACCACCAGGCAGTGACAGCAACCGGCCCGCTGAGCTCC<br/> ACCGATCCAAACCTGCAGAATATCCCCGTGAGGAATGAGGAGGG<br/> CAGGAGAATCAGACAGGCCTTCATCGCCCCGAGGATTATGTGAT<br/> CGTGTCCGCCGACTACTCTCAGATCGAGCTGAGGATCATGGCCCA<br/> CCTGTCCAGAGATAAAGGGCCTGCTGACAGCCTTCGCCGAGGGCA<br/> AGGACATCCACAGGGCAACCGCAGCAGAGGTGTTTGGCCTGCCT<br/> CTGGAGACAGTGACCTCCGAGCAGCGGCCTCTGCCAAGGCCAT<br/> CAACTTCGGCCTGATCTATGGCATGTCTGCCTTTGGCCTGGCCAG<br/> GCAGCTGAATATCCCTAGAAAGGAGGCCCAGAAGTACATGGACCT<br/> GTATTTTCGAGAGATAACCCCGCGTGTGGAGTACATGGAGAGGA<br/> CACGCGCACAGGCAAAGGAGCAGGGCTATGTGGAGACACTGGAT<br/> GGCAGGAGACTGTACCTGCCAGACATCAAGTCTAGCAACGGAGC<br/> AAGGAGGGCAGCAGCAGAGAGGGCCGCCATCAATGCCCCCATGC<br/> AGGGCAGCCCGGATATCATCAAGAGAGCCATGATCGCAGTG<br/> GACGCCTGGCTGCAGGCAGAGCAGCCAAGGGTGAAGAATGATCAT<br/> GCAGGTGCACGATGAGCTGGTGTGTTGAGGTGACAAGGACGATG<br/> TGGACGCCGTGGCCAAGCAGATCCACCAGCTGATGGAGAACTGT<br/> ACCCGCCTGGATGTGCCACTGCTGGTGAAGTGGGAAGCGGAGAG<br/> GAATTGGGACCAGGCCACTGAG. Peptide sequence:<br/> MDYKDHGDYKDHDIKDDDDKMAPKKRKGVIHGVPAADKKYSI<br/> GLDIGTNSVGVAVITDEYKVPSKFKVLGNTDRHSIKKNLIGALLFDS<br/> GETAEATRLKRTARRRYTRRKNRICYLQEIFSNEMAKVDDSFHRL<br/> ESFLVEEDKKHERHPIFGNIVDEVAYHEKYPTIYHLRKKLVSTDKADL<br/> RLIYLALAHMIKFRGHFLIEGDLNPDNSDVDFLFIQLVQTYNQLFEENPI<br/> NASGVDAKAILSARLSKSRLENLIAQLPGEKKNLFGNLIASLGLTP<br/> NFKSNFDLAEDAKLQLSKDTYDDDLNLLAQIGDQYADFLAAKNLSD<br/> AILLSDILRVNTEITKAPLSASMIKRYDEHHQDLTLLKALVRQQLPEKYK<br/> EIFFDQSKNGYAGYIDGGASQEEFYKFIKPILEKMDGTEILLVKNRE<br/> DLLRKQRTFDNGSIPHQIHLGELHAILRRQEDFYFPLKDNREKIEKILTF<br/> RIPYVVGPLARGNSRFAMTRKSEETITPWNFEVVDDKGASAQSFIE<br/> RMTNFDKNLPNEKVLPHKSLLEYFTVYNELTKVKYVTEGMRKPAFL<br/> SGEQKKAIVDLLFKTNRKVTVKQLKEDYFKKIECFDSVEISGVEDRFN<br/> ASLGTYHDLLKIIKDKDFLDNEENEDILEDIVLTLTFEDREMIERLKY<br/> AHLFDDKVMKQLKRRRYTGWGRLSRKLINGIRDKQSGKTILDFLKS<br/> GFANRNFMLIHDDSLTFKEDIQKAQVSGQGDLSLHEHIANLAGSPAIK</p> |

| No. | Name                               | Purpose                                                                                                                        | Generation strategy                                                                                                                                                                                                                                                                                                                                                                                                                                                                                                                                                                                                                                                                                                                                                                                                                                                                                                                                                                                                                                                                                                                                                                                                                                                                                                                                                                                                                                                                                                                                                                                                                                                                                                                                                                                      |
|-----|------------------------------------|--------------------------------------------------------------------------------------------------------------------------------|----------------------------------------------------------------------------------------------------------------------------------------------------------------------------------------------------------------------------------------------------------------------------------------------------------------------------------------------------------------------------------------------------------------------------------------------------------------------------------------------------------------------------------------------------------------------------------------------------------------------------------------------------------------------------------------------------------------------------------------------------------------------------------------------------------------------------------------------------------------------------------------------------------------------------------------------------------------------------------------------------------------------------------------------------------------------------------------------------------------------------------------------------------------------------------------------------------------------------------------------------------------------------------------------------------------------------------------------------------------------------------------------------------------------------------------------------------------------------------------------------------------------------------------------------------------------------------------------------------------------------------------------------------------------------------------------------------------------------------------------------------------------------------------------------------|
|     |                                    |                                                                                                                                | <p>KGILQTVKVVDELVKVMGRHKPENIVEMARENQTTQKGQKNSRERM<br/> KRIEEGIKELGSQILKEHPVENTQLQNEKLYLYLQNGRDMYVDQELD<br/> INRLSDYDVDHIVPQSFLKDDSIDNKVLRSDKNRKGSDNVPSEEVVK<br/> KMKNYWRQLLNAKLITQRKFDNLTKAERGGSELKAGFIKRLQVET<br/> RQITKHVAQILDSRMNTKYDENDKLIREVKVITLKSCLVSDFRKDFQFY<br/> KVREINNYHHAHDAYLNAVVG TALIKKYPKLESEFVYGDYKVYDVRK<br/> MIAKSEQEIGKATAKYFFYSNIMNFFKTEITLANGEIRKRPLIETNGETG<br/> EIVWDKGRDFATVRKVL SMPQVNIKKTEVQTGGFSKESILPKRNSD<br/> KLIARKKDWDPKYGGFDSPTVAYSVLVAKVEKGSKLLKSVKELL<br/> GITIMERSSEKPNIDFLEAKGYKEVKDLIILPKYSLFEENGRKRM<br/> ASAGELQKGNELALPSKYVNFY LASHYEKLGSPEDNEQKQLFVEQ<br/> HKHYLDEIIEQISEFSKRVLADANL DKVLSAYNKHRDKPIREQAENIHL<br/> FTLNLGAPAAFKYFDTTIDRKRYTSTKEVLDTLHQSITGLYETRIDL<br/> SQLGGDKRPAATKKAGQAKKKKGSSETPGTSESATPEGGAPEVTAT<br/> VISYDNYVTILDEETLKAWIAKLEKAPVFAFDTE TDSLNDISANLVGLSF<br/> AIEPGVAAYIPVAHDYLDAPDQISRERALELLKPLLEDEKALKVGGQNLK<br/> YDRGILANYGIELRGIAFDTMLESYILNSVAGRHDMSLAERWLKHKTI<br/> TFEEIAGKGNQLTFNQIALEEAGRYAAEDADVTLQLHLKMWPDQK<br/> HKGPLNVFENIEMPLVPVLSRIERNGVKIDPKVLHNSHEELTLRLAELE<br/> KKAHEIAGEEFNLSSTKQLQTLFEKQGIKPLKKTGGAPSTSEEVLEE<br/> LALDYPLPKVILEYRGLAKLKSTYTDKPLMINPKTGRVTSYHQAVTA<br/> TGRLSSTDPNLQNI PVRNEEGRRIRQAFIAPEDYVIVSADYSQIELRIM<br/> AHLSRDKGLLTAFAEGKDIHRATAAEVGLPLET VTSEQRRSAKAINF<br/> GLIYGMSAFLARQLNIPRKEAQKYM DLYFERYPGVLEYMERTRAQA<br/> KEQGYVETLDGRRLYLPDIKSSNGARRAAAERAANAPMQGTAADIK<br/> RAMIAVDAWLQAEQPRVRMIMQVHDELVFEVHKDDVDVAVAKQHQL<br/> MENCTRLDVPLLVEVGS GENWDQAH (Color Key: Cas9-linker-<br/> Klenow)</p>                                                                                                                                                                                                                                                                                       |
| 4   | pspCas9-3exo-Tetra-com-CLCN5-sp-g1 | Plasmid for expressing a fusion protein of spCas9 and the 3' exonuclease domain of POLI, and sgRNA targeting human CLCN5 gene. | <p>Use pspCas9-exo-tetra-com-hCLCN5-sp-g1 as the template and Klenow-F (GTCTGCCACCCCTGAGGGAGGAGCACCAGAGGTGACAGCCAC) and 3exo-R (CtaggaatttctagactaGTGCTTCTGCAGATCTGGCCAC) to amplify a 650 bp fragment. This fragment was inserted between the Bsu36I and XbaI sites of pspCas9-exo-tetra-com-hCLCN5-sp-g1 Infusion reaction. Nucleic acid sequence:<br/> ATGGACTATAAGGACCACGACGGAGACTACAAGGATCATGATATT<br/> GATTACAAAGACGATGACGATAAGATGGCCCCAAAGAAGAAGCGG<br/> AAGGTCGGTATCCACGGAGTCCCAGCAGCCGACAAGAAGTACAG<br/> CATCGGCCTGGACATCGGCACCAACTCTGTGGCTGGGCGTGA<br/> TCACCGACGAGTACAAGGTGCCAGCAAGAAATTCAAGGTGCTGG<br/> GCAACACCGACCGGCACAGCATCAAGAAGAACCTGATCGGAGCC<br/> CTGCTGTTTCGACAGCGGCGAAACAGCCGAGGCCACCCGGCTGAA<br/> GAAACCGCCAGAAGAAGATACACCAGACGGAAGAACCGGATCT<br/> GCTATCTGCAAGAGATCTTCAAGCAACGAGATGGCCAAGGTGGAC<br/> ACAGCTTCTTCCACAGACTGGAAGAGTCTTCTGCTGGAAGAGG<br/> ATAAGAAGCACGAGCGGCACCCCATCTTCGGCAACATCGTGGAC<br/> GAGGTGGCCTACCACGAGAAGTACCCACCATCTACCACCTGAGA<br/> AAGAAACTGGTGGACAGCACCGACAAGGCCGACCTGCGCTGAT<br/> CTATCTGGCCCTGGCCACATGATCAAGTTCGGGGCCACTTCTCT<br/> GATCGAGGGCGACCTGAACCCCGACAACAGCGACGTGGACAAGC<br/> TGTTCAACAGCTGGTGCAGACCTACAACCAGCTGTTCCGAGGAAA<br/> ACCCCATCAAGCCAGCGGCGTGGACGCCAAGGCCATCTGTCT<br/> GCCAGACTGAGCAAGAGCAGACGGCTGGAAAATCTGATCGCCCA<br/> GCTGCCCGGCGAGAAGAAGATGGCCTGTTCCGAAACCTGATTG<br/> CCCTGAGCCTGGGCTGACCCCAACTTCAAGAGCAACTTGACC<br/> TGCCCGAGGATGCCAAACTGCAGCTGAGCAAGGACACTACGAC<br/> GACGACCTGGACAACCTGCTGGCCAGATCGGCGACCAAGTACGC<br/> CGACCTGTTTCTGGCCGCAAGAACCTGTCCGACGCCATCTGCT<br/> GAGCGACATCTGAGAGTGAACACCGAGATACCAAGGCCCCCC<br/> TGAGCGCTCTATGATCAAGAGATACGACGAGCACCACGAGGAC<br/> TGACCCTGCTGAAAGCTCTCGTGGCGCAGCAGCTGCCTGAGAAG<br/> TACAAAGAGATTTTCTTCGACCAGAGCAAGAACGGCTACGCCGGC<br/> TACATTGACGGCGGAGCCAGCCAGGAAGAGTTCTACAAGTTCATC</p> |

| No. | Name | Purpose | Generation strategy                                                                                                                                                                                                                                                                                                                                                                                                                                                                                                                                                                                                                                                                                                                                                                                                                                                                                                                                                                                                                                                                                                                                                                                                                                                                                                                                                                                                                                                                                                                                                                                                                                                                                                                                                                                                                                                                                                                                                                                                                                                                                                                                                                                                                                                                                                                                                                                                                                                                                                                                                                                                                                                                                                                                                                                                                                                                                                                                                                                                                                                                                                                                                                                                                                                                                                                                                                                                                                                                                           |
|-----|------|---------|---------------------------------------------------------------------------------------------------------------------------------------------------------------------------------------------------------------------------------------------------------------------------------------------------------------------------------------------------------------------------------------------------------------------------------------------------------------------------------------------------------------------------------------------------------------------------------------------------------------------------------------------------------------------------------------------------------------------------------------------------------------------------------------------------------------------------------------------------------------------------------------------------------------------------------------------------------------------------------------------------------------------------------------------------------------------------------------------------------------------------------------------------------------------------------------------------------------------------------------------------------------------------------------------------------------------------------------------------------------------------------------------------------------------------------------------------------------------------------------------------------------------------------------------------------------------------------------------------------------------------------------------------------------------------------------------------------------------------------------------------------------------------------------------------------------------------------------------------------------------------------------------------------------------------------------------------------------------------------------------------------------------------------------------------------------------------------------------------------------------------------------------------------------------------------------------------------------------------------------------------------------------------------------------------------------------------------------------------------------------------------------------------------------------------------------------------------------------------------------------------------------------------------------------------------------------------------------------------------------------------------------------------------------------------------------------------------------------------------------------------------------------------------------------------------------------------------------------------------------------------------------------------------------------------------------------------------------------------------------------------------------------------------------------------------------------------------------------------------------------------------------------------------------------------------------------------------------------------------------------------------------------------------------------------------------------------------------------------------------------------------------------------------------------------------------------------------------------------------------------------------------|
|     |      |         | <p>AAGCCCATCTGGAAAAGATGGACGGCACCAGGAAGTCTGCTGCT<br/> GAAGCTGAACAGAGAGGACCTGCTGCGGAAGCAGCGGACCTTCG<br/> ACAACGGCAGCATCCCCACCAGATCCACCTGGGAGAGCTGCAC<br/> GCCATTCTGCGGGCAGGAAGATTTTTACCCATTCTGAAAGGAC<br/> AACCGGAAAAGATCGAGAAGATCCTGACCTCCGCATCCCCTAC<br/> TACGTGGGCCCTCTGGCCAGGGGAAACAGCAGATTCGCTGGAT<br/> GACCAGAAAGAGCGAGGAAACCATCACCCCTGGAACCTCGAGG<br/> AAGTGGTGGACAAGGGCGCTTCCGCCAGAGCTTCATCGAGCGG<br/> ATGACCAACTTCGATAAGAACCTGCCAACGAGAAGGTGCTGCC<br/> AAGCACAGCCTGCTGTACGAGTACTTACCCTGTATAACGAGCTG<br/> ACCAAAGTGAATACGTGACCGAGGGAATGAGAAAGCCCCGCCTC<br/> CTGAGCGGCGAGCAGAAAAAGGCCATCGTGGACCTGCTGTTCAA<br/> GACCAACCGAAAAGTGACCGTGAAGCAGCTGAAAGGACTTACTT<br/> CAAGAAAATCGAGTCTCGACTCCGTGGAATCTCCGGCGTGGA<br/> AGATCGGTTCAACGCCTCCCTGGGCACATACCACGATCTGCTGAA<br/> AATTATCAAGGACAAGGACTTCTGGACAATGAGGAAAAACGAGGA<br/> CATTCTGGAAGATATCGTGTGACCTGACACTGTTTGGAGCAG<br/> AGAGATGATCGAGGAACGGCTGAAAACCTATGCCACCTGTTCGA<br/> CGACAAAGTGATGAAGCAGCTGAAGCGGGCGGAGATACACCGGCT<br/> GGGGCAGGCTGAGCCGGAAGCTGATCAACGGCATCCGGGACAA<br/> GCAGTCCGGCAAGACAATCCTGGATTTCTGAAGTCCGACGGCTT<br/> CGCCAACAGAACTTCATGCAGCTGATCCACGACGACAGCCTGAC<br/> CTTTAAAGAGGACATCCAGAAAGCCAGGTGTCCGGCCAGGGCG<br/> ATAGCCTGCACGAGCACATTGCCAATCTGGCCGGCAGCCCGCC<br/> ATTAAGAAGGGCATCCTGACAGCAGTGAAGGTGGTGAGCAGCT<br/> CGTGAAGTGATGGCCCGGCACAAGCCCGAGAATCGTGAATCG<br/> AAATGGCCAGAGAGAACCAGACCACCCAGAAGGGACAGAAGAAC<br/> AGCCGCGAGAGAATGAAGCGGATCGAAGAGGGGCATCAAGAGCT<br/> GGCAGCCAGATCTGAAAGAACACCCCGTGGAAAAACCCACGC<br/> TGCAGAACGAGAAGCTGTACTGTACTACTGCAGAATGGGCGG<br/> GATATGTACGTGGACCAGGAAGTGGACATCAACCGGCTGTCCGAC<br/> TACGATGTGGACCATATCGTGCCTCAGAGCTTTCTGAAGGACGAC<br/> TCCATCGACAACAAGGTGCTGACCAGAAGCGACAAGAACCAGGGG<br/> CAAGAGCGACAACCTGCCCTCCGAAGAGGTCTGAAGTCCGACGTA<br/> AGAATACTGGCGCAGCTGCTGAACGCCAAGCTGATTACCCAGA<br/> GAAAGTTCGACAATCTGACCAAGGCCGAGAGAGGGCGGCTGAGC<br/> GAACTGGATAAAGCCGGCTTCATCAAGAGACAGCTGGTGGAAAC<br/> CCGGCAGATCACAAGCACGTGGCACAGATCCTGGACTCCCGGA<br/> TGAACACTAAGTACGACGAGAATGACAAGCTGATCCGGGAAGTGA<br/> AAGTATCACCTGAAGTCCAAGCTGGTGTCCGATTTCCGGAAGG<br/> ATTTCCAGTTTTACAAAGTGCAGGAGATCAACAATACCACCACGC<br/> CCACGACCCCTACCTGAACGCCGTCTGGGAACCCCTGATCA<br/> AAAAGTACCCCTAAGCTGGAAGCGAGTTCTGTACGGCGACTACA<br/> AGGTGTACGACGTGCGGAAGATGATCGCCAAGAGCGAGCAGGAA<br/> ATCGGCAAGGCTACCGCCAAGTACTTCTTCTACAGCAACATCATG<br/> AACTTTTTCAAGACCGAGATTACCCTGGCCAACGGCGAGATCCGG<br/> AAGCGCCTCTGATCGAGACAACGGCGAAACCCGGAGATCGT<br/> GTGGGATAAGGGCCGGGATTTTGCACCGTGGGAAAAGTGTGA<br/> GCATGCCCAAGTGAATATCGTGAAGAACCGAGGTGCAGACAG<br/> CGGGCTTCAGCAAAGAGTCTATCCTGCCCAAGAGGAACAGCGATA<br/> AGCTGATCGCCAGAAAGAAGGACTGGGACCCTAAGAAGTACGGC<br/> GGCTTCGACAGCCCCACCGTGGCCTATTCTGTGCTGGTGGTGGC<br/> CAAAGTGGAAAAGGGCAAGTCCAAGAACTGAAGAGTGTGAAGA<br/> GCTGCTGGGGATCACCATCATGAAAGAAGCAGCTTCGAGAAGAA<br/> TCCCATCGACTTTCTGGAAGCCAAGGGCTACAAAGAAGTGA<br/> GGACCTGATCATCAAGCTGCCTAAGTACTCCCTGTTGAGCTGGA<br/> AAACGGCCGGAAGAGAATGCTGGCCTCTGCCGGCGAACTGCAGA<br/> AGGGAAACGAACTGGCCCTGCCCTCCAAATATGTGAATTCCTGT<br/> ACCTGGCCAGCCACTATGAGAAGCTGAAGGGCTCCCCGAGGAT<br/> AATGAGCAGAAACAGCTGTTTGTGGAACAGCACAAGCACTACTG<br/> GACGAGATCATCGAGCAGATCAGCGAGTTCTCCAAGAGAGTGATC<br/> CTGGCCGACGCTAATCTGGACAAAGTGTGTCCGCCTACAACAAG<br/> CACCGGGATAAGCCATCAGAGAGCAGGCCGAGAATATCATCCA<br/> CCTGTTTTACCTGACCAATCTGGGAGCCCTGCCGCTTCAAGTA<br/> CTTTGACACCACCATCGACCGGAAGAGGTACACCAGCACCAAGA<br/> GGTGTGACGCGCCACCCTGATCCACCAGAGCATCACCGGCTGT<br/> ACGAGACACGGATCGACCTGTCTCAGCTGGGAGGCGACAAAAGG<br/> CCGGCGCCACGAAAAAGGCCGGccaggcaaaaagaaaaggGATCC</p> |

| No. | Name                               | Purpose                                                                                                                               | Generation strategy                                                                                                                                                                                                                                                                                                                                                                                                                                                                                                                                                                                                                                                                                                                                                                                                                                                                                                                                                                                                                                                                                                                                                                                                                                                                                                                                                                                                                                                                                                                                                                                                                                                                                                                                                                                                                                                                                                                                                                                                                                                                                                                                                                                                                                                                                                                                                                                                                                                                                                                                                                                                                                                                                        |
|-----|------------------------------------|---------------------------------------------------------------------------------------------------------------------------------------|------------------------------------------------------------------------------------------------------------------------------------------------------------------------------------------------------------------------------------------------------------------------------------------------------------------------------------------------------------------------------------------------------------------------------------------------------------------------------------------------------------------------------------------------------------------------------------------------------------------------------------------------------------------------------------------------------------------------------------------------------------------------------------------------------------------------------------------------------------------------------------------------------------------------------------------------------------------------------------------------------------------------------------------------------------------------------------------------------------------------------------------------------------------------------------------------------------------------------------------------------------------------------------------------------------------------------------------------------------------------------------------------------------------------------------------------------------------------------------------------------------------------------------------------------------------------------------------------------------------------------------------------------------------------------------------------------------------------------------------------------------------------------------------------------------------------------------------------------------------------------------------------------------------------------------------------------------------------------------------------------------------------------------------------------------------------------------------------------------------------------------------------------------------------------------------------------------------------------------------------------------------------------------------------------------------------------------------------------------------------------------------------------------------------------------------------------------------------------------------------------------------------------------------------------------------------------------------------------------------------------------------------------------------------------------------------------------|
|     |                                    |                                                                                                                                       | <p>TCTGAGACACCAGGCACCTCCGAGTCTGCCACCCTGAGGGAGG<br/> AGCACCAGAGGTGACAGCCACCGTATCTCCTACGATAACTATGT<br/> GACAATCCTGGACGAGGAGACACTGAAGGCCTGGATCGCCAAGC<br/> TGGAGAAGGCCCCCGTGTTCGCCTTTGATACAGAGACAGACAGCC<br/> TGGATAACATCTCCGCCAATCTGGTGGGCTGTCTTTCGCCATCG<br/> AGCCTGGCGTGGCCGCTATATCCCAGTGGCCACGACTACCTG<br/> GATGCCCCCGACCAGATCAGCAGGGAGAGGCCCTGGAGCTGCT<br/> GAAGCCTCTGCTGGAGGATGAGAAGGCCCTGAAGGTCGGCCAGA<br/> ACCTGAAGTATGACAGGGGCATCCTGGCCAATTACGGCATCGAGC<br/> TGAGAGGCATCGCCTTTGACACCATGCTGGAGTCTTATATCCTGA<br/> ATAGCGTGGCAGGCCGGCAGACATGGATCCCTGGCCGAGAGG<br/> TGGCTGAAGCACAAAGACAATCACCTTCGAGGAGATCGCCGAGAA<br/> GGGCAAGAACCAGCTGACCTTCAACCAGATCGCCCTGGGGAGG<br/> CAGGCAGGTACGCAGCAGAGGACGCAGATGTGACCCTGCAGCTG<br/> CACCTGAAGATGTGGCCAGATCTGCAGAAGCActag. Peptide<br/> sequence:<br/> MDYKDHDGDYKDHDIDYKDDDDKMAPKKRKRKVGIHGVAADKKYSI<br/> GLDIGTNSVGVAVITDEYKVPSSKFKVLGNTDRHSIKNLIGALLFDS<br/> GETAEATRLKRTARRRYTRRKNRICYLQEIFSNEMAKVDDSFHRL<br/> ESFLVEEDKKHERHPFGNIVDEVAYHEKYPTIYHLRKKLVSTDKADL<br/> RLIYLALAHMIKFRGHFLIEGDLNPDNSDVDFLQIQLVQTYNQLFEENPI<br/> NASGVDAKAILSARLSKSRLENLIAQLPGEKKNGLFNLIALSLGLTP<br/> NFKSNFDLAEDAKQLSKDYYDDDLNLLAQIGDQYADLFLAAKNLSD<br/> AILLSDILRVNTEITKAPLSASMIKRYDEHHQDLTLLKALVRQQLPEKYK<br/> EIFFDQSKNGYAGYIDGGASQEEFYKFIKPILEKMDGTEELLVKNRE<br/> DLLRKQRTFDNGSIPHQIHLGELHAILRRQEDFYPLKDNREKIEKILTF<br/> RIPYYVGPLARGNSRFAMTRKSEETITPWNFEVVDPKASQSFIE<br/> RMTNFDKNLPNEKVLPHSLLYEYFTVYNELTKVKYVTEGMRKPAFL<br/> SGEQKKAIVDLLFKTNRKVTVKQLKEDYFKKIECFDSVEISGVEDRFN<br/> ASLGTYHDLLKIKDKDFLDNEENEDILEDIVLTLTFEDREMIERLKY<br/> AHLFDDKVMKQLKRRRYTGWGRLSRKLINGIRDKQSGKTILDFLKS<br/> GFANRNFMLIHDDSLTFKEDIQKAQVSGQGDLSLHEHIANLAGSPA<br/> KIGILQTVKVVDELVKVMGRHKPENIVEMARENQTTQKQKNSRERM<br/> KRIEEGIKELGSQILKEHPVENTQLQNEKLYLYLQNGRDMYVDQELD<br/> INRLSDYDVDHIVPQSFLKDDSIDNKVLRSDKNRGKSDNVPSEVVK<br/> KMKNYWRQLLNAKLITQRKFDNLTKAERGGSELKAGFIKQRLVET<br/> RQITKHVAQILDSRMNTKYDENDKLIREVKVITLKSCLVSDFRKDFQFY<br/> KVREINNYHHADAYLNAVVGTAIKKYPKLESEFVYGDYKYVDVRK<br/> MIKSEQEIGKATAKYFFYSNIMNFFKTEITLANGEIRKRLIETNGETG<br/> EIVWDKGRDFATVRKVLSPQVNIKKTEVQTGGFSKESILPKRNSD<br/> KLIARKKDWDPKYGDFDPTVAYSVLVAVKVEKGSKLLKSVKELL<br/> GITIMERSSEKPNIDFLEAKGYKEVKKDLIILPKYSLFELENRGRKML<br/> ASAGELQKGNELALPSKYVNFLYLASHYEKLGSPEDNEQKQLFVEQ<br/> HKHYLDEIIEQISEFSKRVLADANLDKVL SAYNKHRDKPIREQAENIHL<br/> FTLNLGAPAAFKYFDTTIDRKRYTSTKEVLDTLHQSIITGLYETRIDL<br/> SQLGGDKRPAATKKAGQAKKKKGSSETPGTSESATPEGGAPEVTAT<br/> VISYDNYVTILDEETLKAWIAKLEKAPVFAFDTEITDSDLNISANLGLSF<br/> AIEPGVAAYIPVAHDYLDAPDQISRERALELLKPLLEDEKALKVGNL<br/> YDRGILANYGIELRGIAFDTMLESYILNSVAGRHDMDSLAERWLKHKTI<br/> TFEEIAGKGNQLTFNQIALEEAGRYAAEDADVTLQLHLKMWPDLQK<br/> H(Color Key: Cas9-linker-3' exo)</p> |
| 5   | pspCas9-Exo-tetra-com-hCLCN5-sp-g1 | Plasmid for expressing a fusion protein of spCas9 and the 5' and 3' exonuclease domain of POLI, and sgRNA targeting human CLCN5 gene. | <p>Cut pspCas9-POLI-tetra-com-hCLCN5-sp-g1 with Accl+NheI to remove the DNA coding for the DNA polymerase activity. Treat the DNA with the Klenow fragment of DNA POLI to make blunt ends. Then use T4 DNA ligase to ligate the ends.</p> <p>Nucleic acid sequence:<br/> ATGGACTATAAGGACCACGACGGAGACTACAAGGATCATGATATT<br/> GATTACAAAGACGATGACGATAAGATGGCCCCAAAGAAGAAGCGG<br/> AAGGTCGGTATCCACGGAGTCCCAGCAGCCGACAAGAAGTACAG<br/> CATCGGCCTGGACATCGGCACCAACTCTGTGGGCTGGCCGCTGA<br/> TCACCGACGAGTACAAGGTGCCAGCAAGAAATTCAAGGTGCTGG<br/> GCAACACCGACCGGCACAGCATCAAGAAGAACCTGATCGGAGCC<br/> CTGCTGTTTCGACAGCGGCGAAACAGCCGAGGCCACCCGGCTGAA<br/> GAGAACCGCCAGAAGAAGATACACCAGACGGAAGAACCAGCTCT<br/> GCTATCTGCAAGAGATCTTCAGCAACGAGATGGCCAAGGTGGACG<br/> ACAGCTTCTTCCACAGACTGGAAGAGTCTTCTGCTGGTGAAGAGG<br/> ATAAGAAGCACGAGCGGCACCCCATCTTCGGCAACATCGTGGAC<br/> GAGGTGGCCTACCACGAGAAGTACCCACCATCTACCACCTGAGA</p>                                                                                                                                                                                                                                                                                                                                                                                                                                                                                                                                                                                                                                                                                                                                                                                                                                                                                                                                                                                                                                                                                                                                                                                                                                                                                                                                                                                                                                                                                                                                                                                                                                                                                                                                                                                                       |

| No. | Name | Purpose | Generation strategy                                                                                                                                                                                                                                                                                                                                                                                                                                                                                                                                                                                                                                                                                                                                                                                                                                                                                                                                                                                                                                                                                                                                                                                                                                                                                                                                                                                                                                                                                                                                                                                                                                                                                                                                                                                                                                                                                                                                                                                                                                                                                                                                                                                                                                                                                                                                                                                                                                                                                                                                                                                                                                                                                                                                                                                                                                                                                                                                                                                                                                                                                                                                                                                                                                                                                                                                                                                                                                                                                                              |
|-----|------|---------|----------------------------------------------------------------------------------------------------------------------------------------------------------------------------------------------------------------------------------------------------------------------------------------------------------------------------------------------------------------------------------------------------------------------------------------------------------------------------------------------------------------------------------------------------------------------------------------------------------------------------------------------------------------------------------------------------------------------------------------------------------------------------------------------------------------------------------------------------------------------------------------------------------------------------------------------------------------------------------------------------------------------------------------------------------------------------------------------------------------------------------------------------------------------------------------------------------------------------------------------------------------------------------------------------------------------------------------------------------------------------------------------------------------------------------------------------------------------------------------------------------------------------------------------------------------------------------------------------------------------------------------------------------------------------------------------------------------------------------------------------------------------------------------------------------------------------------------------------------------------------------------------------------------------------------------------------------------------------------------------------------------------------------------------------------------------------------------------------------------------------------------------------------------------------------------------------------------------------------------------------------------------------------------------------------------------------------------------------------------------------------------------------------------------------------------------------------------------------------------------------------------------------------------------------------------------------------------------------------------------------------------------------------------------------------------------------------------------------------------------------------------------------------------------------------------------------------------------------------------------------------------------------------------------------------------------------------------------------------------------------------------------------------------------------------------------------------------------------------------------------------------------------------------------------------------------------------------------------------------------------------------------------------------------------------------------------------------------------------------------------------------------------------------------------------------------------------------------------------------------------------------------------------|
|     |      |         | <p>AAGAACTGGTGGACAGCACCGACAAGGCCGACCTGCGGCTGAT<br/> CTATCTGGCCCTGGCCACATGATCAAGTTCCGGGGCCACTTCT<br/> GATCGAGGGCGACCTGAACCCCGACAACAGCGACGTGGACAAGC<br/> TGTTTCATCCAGCTGGTGCAGACCTACAACCAGCTGTTCCGAGGAAA<br/> ACCCCATCAACGCCAGCGGCGTGGACGCCAAGGCCATCTGTCT<br/> GCCAGACTGAGCAAGAGCAGACGGCTGAAAAATCTGATCGCCCA<br/> GCTGCCCGGCGAGAAGAAGAATGGCCTGTTCCGAAACCTGATTG<br/> CCCTGAGCCTGGGCCTGACCCCAACTTCAAGAGCAACTTCGACC<br/> TGGCCGAGGATGCCAAACTGCAGCTGAGCAAGGACACCTACGAC<br/> GACGACCTGGACAACCTGCTGGCCAGATCGGCGACCAGTACGC<br/> CGACCTGTTTCTGGCCGCCAAGAACCTGTCCGACGCCATCTGCT<br/> GAGCGACATCCTGAGAGTGAACACCGAGATCACAAGGCCCCCC<br/> TGAGCGCCTCTATGATCAAGAGATACGACGAGCAACACCGAGGAC<br/> TGACCCTGCTGAAAGCTCTCGTGCGGCAGCAGCTGCCTGAGAAG<br/> TACAAAGAGATTTTCTTCGACCAGAGCAAGAACGGCTACGCCGGC<br/> TACATTGACGGCGGAGCCAGCCAGGAAGAGTTTACAAGTTCATC<br/> AAGCCATCCTGAAAAAGATGGACGGCACCGAGGAACCTCGT<br/> GAAGCTGAACAGAGAGGACCTGCTGCGGAAGCAGCGGACCTTCG<br/> ACAACGGCAGCATCCCCACCAGATCCACCTGGGAGAGCTGCAC<br/> GCCATTCTGCGGCGGAGGAAGATTTTTACCCATTCTGAAGGAC<br/> AACCGGAAAAAGATCGAGAAGATCCTGACCTTCCGATCCCCCTAC<br/> TACGTGGGCCCTCTGGCCAGGGGAAAACAGCAGATTGCGCTGGAT<br/> GACCAGAAAGAGCGAGGAAACCATCACCCCTGGAACCTTCGAGG<br/> AAGTGGTGGACAAGGGCGCTTCCGCCAGAGCTTCATCGAGCGG<br/> ATGACCAACTTCGATAAGAACCTGCCAACGAGAAGTGTGCC<br/> AAGCACAGCCTGCTGTACGAGTACTTCAACCGTGTATAACCGCTG<br/> ACCAAAGTAAATACGTGACCGAGGGAATGAGAAAGCCCGCCTTC<br/> CTGAGCGGGCAGCAGAAAAAGGCCATCGTGACCTGCTGTTCAA<br/> GACCAACCGGAAAGTGACCGTGAAGCAGTGAAGAGGACTACTT<br/> CAAGAAAAATCGAGTGCTTCCGACTCCGTGGAATCTCCGGCTGGA<br/> AGATCGGTTCAACGCCTCCCTGGGCACATACCACGATCTGCTGAA<br/> AATTATCAAGGACAAGGACTTCTGACAAATGAGGAAAAACGAGGA<br/> CATTCTGGAAGATATCGTGCTGACCCTGACACTGTTTGAGGACAG<br/> AGAGATGATCGAGGAACGGCTGAAAACCTATGCCACCTGTTTCGA<br/> CGACAAAGTGATGAAGCAGCTGAAGCGGGCGGAGATACACCGGCT<br/> GGGGCAGGCTGAGCCGGAAGCTGATCAACGGCATCCGGGACAA<br/> GCAGTCCGGCAAGACAATCCTGGATTTCTGAAGTCCGACGGCTT<br/> CGCCAACAGAACTTTCATGCAGCTGATCCACGACGACAGCCTGAC<br/> CTTTAAAGAGGACATCCAGAAAGCCAGGTGTCCGGCCAGGGCG<br/> ATAGCCTGCACGACATTGCCAATCTGGCCGGCAGCCCGCC<br/> ATTAAGAAAGGCATCCTGCAGACAGTGAAGGTGGTGGACGAGCT<br/> CGTGAAGTGATGGGCCGCAAGCCCGAGAACATCGTATCG<br/> AAATGGCCAGAGAGAACCAGACCACCCAGAAGGGACAGAAAC<br/> AGCCGCGAGAGAATGAAGCGGATCGAAGAGGGCATCAAAGAGCT<br/> GGGCAGCCAGATCCTGAAAGAACACCCCGTGGAAAAACACCCAGC<br/> TGCAGAACGAGAAGCTGTACCTGTACTACCTGCAGAATGGGCGG<br/> GATATGTACGTGGACCAGGAAGTGGACATCAACCGGCTGTCCGAC<br/> TACGATGTGGACCATATCGTGCCCTCAGAGCTTTCTGAAGGACGAC<br/> TCCATCGACAACAAGGTGCTGACCAGAAGCGACAAGAACCAGGGG<br/> CAAGAGCGACAACGTGCCCTCCGAAGAGGTCTGGAAGAAGATGA<br/> AGAACTACTGGCGGACGCTGCTGAACGCCAAGCTGATTACCCAGA<br/> GAAAGTTCGACAATCTGACCAAGGCCGAGAGAGGGCGGCTGAGC<br/> GAACTGGATAAGGCCGGCTTTCATCAAGAGACAGCTGGTGGAAAC<br/> CCGGCAGATCACAAGCAGTGGCACAGATCCTGGACTCCCGGA<br/> TGAACACTAAGTACGACGAGAATGACAAGCTGATCCGGGAAGTGA<br/> AAGTGATCACCTGAAGTCCAAGCTGGTGTCCGATTTCCGGAAGG<br/> ATTTCCAGTTTTACAAAGTGCAGGAGATCAACAACCTACCACCAGC<br/> CCACGACGCCTACCTGAACGCCGTCTGGGAACCGCCCTGATCA<br/> AAAAGTACCCTAAGCTGGAAGCGAGTTCTGTACGGCGACTACA<br/> AGGTGTACGACGTGCGGAAGATGATCGCCAAGAGCGGAGGAGAA<br/> ATCGGCAAGGCTACCGCAAGTACTTCTTCTACAGCAACATCATG<br/> AACTTTTTCAAGACCGAGATTACCCTGGCCAACGGCGAGATCCGG<br/> AAGCGGCCTCTGATCGAGACAAACGGCGAAACCGGGGAGATCGT<br/> GTGGGATAAGGGCCGGGATTTTGCACCGTGCAGAAAGTGTGA<br/> GCATGCCCAAGTGAATATCGTGA AAAAGACCGAGGTGCAGACAG<br/> GCGGCTTCAGCAAAGAGTCTATCCTGCCAAGAGGAACAGCGATA<br/> AGCTGATCGCCAGAAAGAGGACTGGGACCCTAAGAAGTACGGC<br/> GGCTTCGACAGCCCCACCGTGGCCTATTCTGTGCTGGTGGTGGC</p> |

| No. | Name | Purpose | Generation strategy                                                                                                                                                                                                                                                                                                                                                                                                                                                                                                                                                                                                                                                                                                                                                                                                                                                                                                                                                                                                                                                                                                                                                                                                                                                                                                                                                                                                                                                                                                                                                                                                                                                                                                                                                                                                                                                                                                                                                                                                                                                                                                                                                                                                                                                                                                                                                                                                                                                                                                                                                                                                                                                                                                                                                                                                                                                                                                                                                                                                                                                                                                                                                                                                                                                                                                                                                                                                                                                                                                                                                                    |
|-----|------|---------|----------------------------------------------------------------------------------------------------------------------------------------------------------------------------------------------------------------------------------------------------------------------------------------------------------------------------------------------------------------------------------------------------------------------------------------------------------------------------------------------------------------------------------------------------------------------------------------------------------------------------------------------------------------------------------------------------------------------------------------------------------------------------------------------------------------------------------------------------------------------------------------------------------------------------------------------------------------------------------------------------------------------------------------------------------------------------------------------------------------------------------------------------------------------------------------------------------------------------------------------------------------------------------------------------------------------------------------------------------------------------------------------------------------------------------------------------------------------------------------------------------------------------------------------------------------------------------------------------------------------------------------------------------------------------------------------------------------------------------------------------------------------------------------------------------------------------------------------------------------------------------------------------------------------------------------------------------------------------------------------------------------------------------------------------------------------------------------------------------------------------------------------------------------------------------------------------------------------------------------------------------------------------------------------------------------------------------------------------------------------------------------------------------------------------------------------------------------------------------------------------------------------------------------------------------------------------------------------------------------------------------------------------------------------------------------------------------------------------------------------------------------------------------------------------------------------------------------------------------------------------------------------------------------------------------------------------------------------------------------------------------------------------------------------------------------------------------------------------------------------------------------------------------------------------------------------------------------------------------------------------------------------------------------------------------------------------------------------------------------------------------------------------------------------------------------------------------------------------------------------------------------------------------------------------------------------------------------|
|     |      |         | <p>CAAAGTGGAAAAGGGCAAGTCCAAGAACTGAAGAGTGTGAAAGA<br/> GCTGCTGGGGATCACCATCATGGAAAGAAGCAGCTTCGAGAAGAA<br/> TCCCATCGACTTTCTGGAAGCCAAGGGCTACAAAGAAGTGAAAAA<br/> GGACCTGATCATCAAGCTGCCTAAGTACTCCCTGTTCCGAGCTGGA<br/> AAACGGCCGGAAGAGAATGCTGGCCTCTGCCGGCGAACTGCAGA<br/> AGGGAAACGAACTGGCCCTGCCCTCCAAATATGTGAACTTCCTGT<br/> ACCTGGCCAGCCACTATGAGAAGCTGAAGGGCTCCCCCGAGGAT<br/> AATGAGCAGAAACAGCTGTTTTGTGGAACAGCACAAAGCACTACCTG<br/> GACGAGATCATCGAGCAGATCAGCGAGTTCTCCAAGAGAGTGATC<br/> CTGGCCGACGCTAATCTGGACAAAGTGTGTCCGCCTACAACAAG<br/> CACCGGGATAAGCCCATCAGAGAGCAGGGCCGAGAATATCATCCA<br/> CCTGTTTACCCTGACCAATCTGGGAGCCCTGCCGCCTTCAAGTA<br/> CTTTGACACCACCATCGACCGGAAGAGGTACACCAGCACCAGGAA<br/> GGTGCTGGACGCCACCCTGATCCACCAGAGCATCACCGGCCTGT<br/> ACGAGACACGGATCGACCTGTCTCAGCTGGGAGGCCACAAAAGG<br/> CCGGCGGCCACGAAAAAGGCCGGccaggcaaaaaagaaaaaggGATCC<br/> TCTGAGACACCAGGCACCTCCGAGTCTGCCACCCCTGAGCGAGG<br/> AAGCGGAGGAAGCGGCTCCGTGCAGATCCCACAGAACCCCTGA<br/> TCCTGGTGGACGGCAGCTCCTACCTGTATCGGGCCTACCACGCCT<br/> TCCCACCTTGACAACTCCGCCGGAGAGCCAACCGGAGGCCATG<br/> TATGGCGTGTGAATATGCTGAGGAGCCTGATCATGAGTACAAG<br/> CCTACACACGCCGCCGTGGTGTGATGCCAAGGGCAAGACCTC<br/> CGCGACGAGCTGTTTGAGCACTACAAGAGCCACAGGCCACCAAT<br/> GCCTGACGATCTGAGGGCACAGATCGAGCCACTGCACGCAATGG<br/> TGAAGGCCATGGGCTGCCTCTGCTGGCCGTGAGCGGAGTGGAG<br/> GCCGACGATGTGATCGGCACACTGGCAAGGGAGGCAGAGAAGGC<br/> AGGCCGCCAGTGCTGATCTCCACCGGCCACAAGGATATGGCCC<br/> AGCTGGTGACACCAAACATCACCTGATCAACACCATGACAAATA<br/> CCATCCTGGGCCCCGAGGAGGTGGTGAATAAGTATGGCGTGCCT<br/> CCAGAGCTGATCATCGATTTCTGGCCCTGATGGCGACTTAGC<br/> GATAACATCCCTGGCGTGCCAGGAGTGGGAGAAAAAGCCGCACA<br/> GGCCCTGCTGCAGGGCCTGGGAGGCCTGGACACCCTGTACGCC<br/> GAGCCAGAGAAGATCGCCGGCCTGTCTTTAGGGGCGCCAAGAC<br/> AATGGCCGCCAAGCTGGAGCAGAATAAGGAGGTGGCCTACCTGT<br/> CTTATCAGCTGGCCACAATCAAGACCGAGCTGGAGCTGGAGCTGA<br/> CCTGCGAGCAGCTGGAGGTGACAGCAGCCTGCAGCAGAGGAGCTG<br/> CTGGGCCTGTTCAAGAAGTACGAGTTTAAAGAGATGGACAGCCGAT<br/> GTGGAGCCGGCAAGTGGCTGCAGGCAAGGGAGGCAGCAAGCCAG<br/> CAGCAAAGCCACAGGAGACAAGCGTGGCAGACGAGGCACCAGAG<br/> GTGACAGCCACCGTGTCTCCTACGATAACTATGTGACAATCCTG<br/> GACGAGGAGACACTGAAGGCCTGGATCGCCAAGCTGGAGAAGGC<br/> CCCCGTGTTGCCTTTGATACAGAGACAGACAGCCTGGATAACAT<br/> CTCCGCCAATCTGGTGGCCTGTCTTTGCCATCGAGCTGGCCTGGC<br/> GGCCGCTATATCCCAGTGGCCACGACTACCTGGATGCCCCCG<br/> ACCAGATCAGCAGGGAGAGAGCCCTGGAGCTGCTGAAGCCTCTG<br/> CTGGAGGATGAGAAGGCCCTGAAGGTGGCCAGAACCCTGAAGTA<br/> TGACAGGGGCACTCCTGGCCAATTACGGCATCGAGCTGAGAGGCA<br/> TCGCCTTTGACACCATGCTGGAGTCTTATATCCTGAATAGCGTGG<br/> CAGGCCGGCACGACATGGATTCCCTGGCCGAGAGGTGGCTGAAG<br/> CACAAGACAATCACCTTCGAGGAGATCGCCGGCAAGGGCAAGAA<br/> CCAGCTGACCTCAACCAGATCGCCCTGGAGGAGGCAGGCAGGT<br/> ACGACGAGAGGACGCAGATGTGACCCTGCAGCTGCACCTGAAG<br/> ATGTGGCCAGATCTGCAGAAGCACAAGGGCCCCCTGAACGTCTTT<br/> GAGAATATCGAGATGCCCTGGTGCCTGTGCTGAGCCGGATCGA<br/> CGCAACGGCGTGAAGATCGACCCTAAGGTGCTGCACAATCACTC<br/> CGAGGAGCTGACCCTGAGACTGGCCGAGCTGGAGAAGAAGGCCCC<br/> ACGAGATCGCCGGCAGGAGTTCAACCTGTCTCTACAAAGCAGC<br/> TGCAGACCATCCTGTTTGAGAAGCAGGGCATCAAGCCCCTGAAGA<br/> AAACCCCTGGAGGAGCACCATCTACCAGCGAGGAGGTGCTGGAG<br/> GAGCTGGCCCTGGATTATCCCCTGCCATAAAGTATCCTGGAGTAC<br/> CGGGGCTGGCCAAGCTGAAGTCTctagctcgctttctgctccaattctattaa<br/> aggttcctttgtccctaagtccaactactaa. Peptide sequence:<br/> MDYKDHGDYKDHIDYKDDDDKMAPKKRKRKVIHGVPAADKKYSI<br/> GLDIGTNSVGWAVITDEYKVPKFKVLGNTDRHSIKKLNIGALLFDS<br/> GETAEATRLKRTARRRYTRRKNRICYLQEIFSNEMAKVDDSSFFHRL<br/> ESFLVEEDKKHERHPIFGNIVDEVAYHEKYPTIYHLRKKLVDSTDKADL<br/> RLIYLALAHMIKFRGHFLIEGDLNPDNSDVKLFIQLVQTYNQLFEENPI<br/> NASGVDAKAILSARLSKSRRLLENLIAQLPGEKKNGLFGLIALSLGLTP</p> |

| No. | Name                                | Purpose                                                                                                                        | Generation strategy                                                                                                                                                                                                                                                                                                                                                                                                                                                                                                                                                                                                                                                                                                                                                                                                                                                                                                                                                                                                                                                                                                                                                                                                                                                                                                                                                                                                                                                                                                                                                                                                                                                                                                                                                                                                                                                                                                                                                                                                                                                                                                                     |
|-----|-------------------------------------|--------------------------------------------------------------------------------------------------------------------------------|-----------------------------------------------------------------------------------------------------------------------------------------------------------------------------------------------------------------------------------------------------------------------------------------------------------------------------------------------------------------------------------------------------------------------------------------------------------------------------------------------------------------------------------------------------------------------------------------------------------------------------------------------------------------------------------------------------------------------------------------------------------------------------------------------------------------------------------------------------------------------------------------------------------------------------------------------------------------------------------------------------------------------------------------------------------------------------------------------------------------------------------------------------------------------------------------------------------------------------------------------------------------------------------------------------------------------------------------------------------------------------------------------------------------------------------------------------------------------------------------------------------------------------------------------------------------------------------------------------------------------------------------------------------------------------------------------------------------------------------------------------------------------------------------------------------------------------------------------------------------------------------------------------------------------------------------------------------------------------------------------------------------------------------------------------------------------------------------------------------------------------------------|
|     |                                     |                                                                                                                                | <p>NFKSNFDLAEDAKLQLSKDYYDDDLNLLAQIGDQYADLFLAAKNLSD<br/> AILLSDILRVNTEITKAPLSASMIKRYDEHHQDLTLLKALVRQQLPEKYK<br/> EIFFDQSKNGYAGYIDGGASQEEFYKFIKPILEKMDGTEELLVKNLRE<br/> DLLRKQRTFDNGSIPHQIHLGELHAILRRQEDFYFPLKDNREKIEKILTF<br/> RIPYYVGLPARGNSRFAMTRKSEETITPWNFEEVVDKGASQAQSFIE<br/> RMTNFDKKNLPNEKVLPKHSLLYEYFTVYNELTKVKYVTEGMRKPAFL<br/> SGEQKKAIVDLLFKTNRKVTVKQLKEDYFKKIECFDSVEISGVEDRFN<br/> ASLGTYHDLLKIIKDKDFLDNEENEDILEDIVLTLTLFEDREMIERLKY<br/> AHLFDDKVMKQLKRRRYTGWGRLSRKLINGIRDKQSGKTILDFLKSD<br/> GFANRNFMLIHDDSLTFKEDIQKAQVSGQGDLSLHEHIANLAGSPAIK<br/> KGILQTVKVVDELVKVMGRHKPENIVIAMARENQTTQKGQKNSRERM<br/> KRIEEGIKELGSQILKEHPVENTQLQNEKLYLYLQNGRDMYVDQELD<br/> INRLSDYDVDHIVPQSFLKDDSIDNKVLRSDKNRKGSDNVPSEEVVK<br/> KMKNYWRQLLNAKLITQRKFDNLTKAERGGLSELDKAGFIKRQLVET<br/> RQITKHVAQILDSRMNTKYDENDKLIREVKVITLKSCLVSDFRKDFQFY<br/> KVREINNYHHAHDAYLNAVVGALIKKYPKLESEFVYGDYKVYDVRK<br/> MIAKSEQEIGKATAKYFFYSNIMNFFKTEITLANGEIRKRLIETNGETG<br/> EIVWDKGRDFATVRKVLSPQVNVKKEVQTTGGFSKESILPKRNSD<br/> KLIARKKDWDPKKGFFDSPTVAYSVLVAVKVEKGSKLLKSVKELL<br/> GITIMERSSEFEKNPIDFLEAKGYKEVKDLIIKPKYSLFELENRGRKML<br/> ASAGELQKGNELALPSKYVNFLYLASHYEKLGSPEDNEQKQLFVEQ<br/> HKHYLDEIIEQISEFSKRVLADANLKVLSAYNKHDRDKPIREQAENIHL<br/> FTLTLNLGAPAAFKYFDTTIDRKRYTSTKEVLDTLIHQSIITGLYETRIDL<br/> SQLGGDKRPAATKKAGQAKKKKGSSETPGTSESATPEGGSGGSGS<br/> VQIQPNLILVDGSSYLYRAYHAFPPLTNSAGEPTGAMYGLVNLMLRSL<br/> IMQYKPTHAAVVFDAGKTFRDELFEHYKSHRPPMPDDLRAENLPLH<br/> AMVKAMGLPLLAVSGVEADDVIGTLAREAEKAGRPVLISTGDKDMAQ<br/> LVTPNITLINTMTNITLGPPEEVNKYGVPELIIDFLALMGDSSDNIPGV<br/> PGVGEKTAQALLQGLGLDLYAEPEKIAGLSFRGAKTMAAKLEQNK<br/> EVAYLSYQLATIKTDVELELTCEQLLEVQQPAAEELLGLFKKYEFRWT<br/> ADVEAGKWLQAKGAKPAKPKQETSVADEAPEVTATVISYDNYVTILD<br/> EETLKAWIAKLEKAPVFAFDTETDSLNDNISANLVGLSFAIEPGVAAYIPV<br/> AHDYLDAPDQISRERALELLKPLLEDEKALKVGNLKYDRGILANYGIE<br/> LRGIAFDTMLS YILNSVAGRHDMSLAERWLKHKITTFEEIAGKGN<br/> QLTFNQIALEEAGRYAAEDADVTLQLHLKMWPDLQKHKGPLNVFENI<br/> EMPLVPVLSRIERNVGVKIDPKVLHNSSEELTLRLAELEKKAHEIAGEEF<br/> NLSSTKQLQTLFEKQGIKPLKKTGGAPSTSEEVLLEALDYPLPKVIL<br/> EYRGLAKLKSARFLAVQFLKVPKPKSNY (Color Key: Cas9-linker-<br/> exo)</p> |
| 6   | pspCas9-5Exo-tetra-com-hCLCN5-sp-g1 | Plasmid for expressing a fusion protein of spCas9 and the 5' exonuclease domain of POLI, and sgRNA targeting human CLCN5 gene. | <p>Cut pspCas9-POLI-tetra-com-hCLCN5-sp-g1 with ClaI+NheI to remove majority of the POLI coding DNA. Then use 5Exo-F (CAGAGCTGATCATCGATTTCCTGG) and 5Exo-R (AagaagcgagctagccCACGGTGGCTGTCACCTCTGG) to amplify a 400 bp band coding for the 5' exonuclease domain from pspCas9-POLI-tetra-com-hCLCN5-sp-g1. This DNA was inserted into the ClaI+NheI linearized vector by infusion reaction.</p> <p>Nucleic acid sequence:<br/> ATGGACTATAAGGACCACGACGGAGACTACAAGGATCATGATATT<br/> GATTACAAAGACGATGACGATAAGATGGCCCCAAAGAAGAAGCGG<br/> AAGGTCGGTATCCACGGAGTCCCAGCAGCCGACAAGAAGTACAG<br/> CATCGGCCTGGACATCGGCACCAACTCTGTGGGCTGGGCCGTGA<br/> TCACCGACGAGTACAAGGTGCCAGCAAGAAATTCAAGGTGCTGG<br/> GCAACACCGACCGGCACAGCATCAAGAAGAACCTGATCGGAGCC<br/> CTGCTGTTGACAGCGGCGAAACAGCCGAGGCCACCCGGCTGAA<br/> GAGAACC GCCAGAAGAAGATACACCAGACGGAAGAACCGGATCT<br/> GCTATCTGCAAGAGATCTTCAAGCAACGAGATGGCCAAGGTGGACG<br/> ACAGCTTCTCCACAGACTGGAAGAGTCTTCTCGTGGGAAGAGG<br/> ATAAGAAGCACGAGCGGCACCCCATCTTCGGCAACATCGTGGAC<br/> GAGGTGGCCTACCACGAGAAGTACCCACCATCTACCACCTGAGA<br/> AAGAACTGGTGACAGCACCGACAAGGCCGACCTGCGGCTGAT<br/> CTATCTGGCCCTGGCCACATGATCAAGTTCGGGGCCCACTTCT<br/> GATCGAGGGCGACCTGAACCCCGACAACAGCGACCTGGACAAGC<br/> TGTTCCATCCAGCTGGTGCAGACCTACAACCAGCTGTTCCGAGGAAA</p>                                                                                                                                                                                                                                                                                                                                                                                                                                                                                                                                                                                                                                                                                                                                                                                                                                                                        |



| No. | Name | Purpose | Generation strategy                                                                                                                                                                                                                                                                                                                                                                                                                                                                                                                                                                                                                                                                                                                                                                                                                                                                                                                                                                                                                                                                                                                                                                                                                                                                                                                                                                                                                                                                                                                                                                                                                                                                                                                                                                                                                                                                                                                                                                                                                                                                                                                                                                                                                                                                                                                                                                                                                                                                                                                                                                                                                                                                                                                                                                                                                                                                                                                                                                                                                                                                                                                                                                                                                                                                                                                                                                                                                                                                                                                               |
|-----|------|---------|---------------------------------------------------------------------------------------------------------------------------------------------------------------------------------------------------------------------------------------------------------------------------------------------------------------------------------------------------------------------------------------------------------------------------------------------------------------------------------------------------------------------------------------------------------------------------------------------------------------------------------------------------------------------------------------------------------------------------------------------------------------------------------------------------------------------------------------------------------------------------------------------------------------------------------------------------------------------------------------------------------------------------------------------------------------------------------------------------------------------------------------------------------------------------------------------------------------------------------------------------------------------------------------------------------------------------------------------------------------------------------------------------------------------------------------------------------------------------------------------------------------------------------------------------------------------------------------------------------------------------------------------------------------------------------------------------------------------------------------------------------------------------------------------------------------------------------------------------------------------------------------------------------------------------------------------------------------------------------------------------------------------------------------------------------------------------------------------------------------------------------------------------------------------------------------------------------------------------------------------------------------------------------------------------------------------------------------------------------------------------------------------------------------------------------------------------------------------------------------------------------------------------------------------------------------------------------------------------------------------------------------------------------------------------------------------------------------------------------------------------------------------------------------------------------------------------------------------------------------------------------------------------------------------------------------------------------------------------------------------------------------------------------------------------------------------------------------------------------------------------------------------------------------------------------------------------------------------------------------------------------------------------------------------------------------------------------------------------------------------------------------------------------------------------------------------------------------------------------------------------------------------------------------------------|
|     |      |         | <p> ACCCCATCAACGCCAGCGGCGTGGACGCCAAGGCCATCTGTCT<br/> GCCAGACTGAGCAAAGCAGACGGCTGGAAAATCTGATCGCCCA<br/> GCTGCCCGGCGAGAAGAAGAATGGCCTGTTCCGAAAACCTGATTG<br/> CCCTGAGCCTGGGCCTGACCCCAACTTCAAGAGCAACTTCGACC<br/> TGGCCGAGGATGCCAAACTGCAGCTGAGCAAGGACACCTACGAC<br/> GACGACCTGGACAACTGCTGGCCAGATCGGCGACCACTACGC<br/> CGACCTGTTTCTGGCCGCAAGAACCTGTCCGACGCCATCTGTCT<br/> GAGCGACATCTGAGAGTGAACACCGAGATCACCAAGGCCCCCC<br/> TGAGCGCCTCTATGATCAAGAGATACGACGAGCACCACCAGGACC<br/> TGACCCTGCTGAAAGCTCTCGTGCGGCAGCAGCTGCCTGAGAAG<br/> TACAAAGAGATTTTCTTCGACCAGAGCAAGAACGGCTACGCCGGC<br/> TACATTGACGGCGGAGCCAGCCAGGAAGAGTTTACAAGTTTCATC<br/> AAGCCCATCCTGGAAAAGATGGACGGCACCGAGGACCTCCCTGT<br/> GAAGCTGAACAGAGAGGACCTGCTGCGGAAGCAGCGGACCTTCG<br/> ACAACGGCAGCATCCCCACCAAGATCCACCTGGGAGAGCTGCAC<br/> GCCATTCTGCGGCGGCAGGAAGATTTTTACCCATTCTGAAGGAC<br/> AACCGGAAAAAGATCGAGAAGATCCTGACCTTCGCTCCCTAC<br/> TACGTGGGCCCTCTGGCCAGGGGAAACAGCAGATTCGCTGGAT<br/> GACCAGAAAGAGCGAGGAAACCATCACCCCTGGAACTTCGAGG<br/> AAGTGGTGGACAAGGGCGCTTCCGCCAGAGCTTCATCGAGCGG<br/> ATGACCAACTTCGATAAGAACCTGCCAACGAGAAGGTGCTGCC<br/> AAGCACAGCCTGCTGTACGAGTACTTACCGTGTATAACGAGCTG<br/> ACCAAAGTGAATACGTGACCGAGGGAATGAGAAAGCCCGCCTTC<br/> CTGAGCGGCGAGCAGAAAAAGGCCATCGTGGACCTGCTGTTCAA<br/> GACCAACCGGAAAGTGACCGTGAAGCAGCTGAAAGAGGACTACTT<br/> CAAGAAAAATCGAGTGCTTCCGACTCCGTGGAAATCTCCGGCTGGA<br/> AGATCGGTTCAAGCCTCCCTGGGCACATACCACGATCTGCTGAA<br/> AATTATCAAGGACAAGGACTTCTGGACAATGAGGAAAAACGAGGA<br/> CATTCTGGAAGATATCGTGCTGACCCTGACACTGTTTGAGGACAG<br/> AGAGATGATCGAGGAACGGCTGAAAACCTATGCCACCTGTTTGA<br/> CGACAAAGTGATGAAGCAGCTGAAGCGGCGGAGATACACCGGCT<br/> GGGGCAGGCTGAGCCGGAAGCTGATCAACGGCATCCGGGACAA<br/> GCAGTCCGGCAAGACAATCCTGGATTTCTGAAGTCCGACGGCTT<br/> CGCCAACAGAAAACCTTCATGCAGCTGATCCACGACGACAGCTGAC<br/> CTTTAAAGAGGACATCCAGAAAGCCAGGTGTCCGGCCAGGGCG<br/> ATAGCCTGCACGACACATTGCCAATCTGGCCGGCAGCCCGCC<br/> ATTAAGAAGGGCATCCTGCAGACAGTGAAGGTGGTGGACGAGCT<br/> CGTGAAGTGATGGGCGGCGACAAGCCGAGAACATCGTGATCG<br/> AAATGGCCAGAGAGAACCAGACCACCCAGAAGGGACAGAAGAAC<br/> AGCCGCGAGAGAATGAAGCGGATCGAAGAGGGCATCAAAGAGCT<br/> GGGCAGCCAGATCCTGAAAGAACACCCCGTGGAAAAACACCCAGC<br/> TGCAGAACGAGAAGCTGTACCTGTACTACCTGCAGAATGGGCG<br/> GATATGTACGTGGACCAGGAACCTGGACATCAACCGGCTGTCCGAC<br/> TACGATGTGGACCATATCGTGCCTCAGAGCTTTCTGAAGGACGAC<br/> TCCATCGACAACAAGGTGCTGACCAGAAGCGACAAGAACCAGGGG<br/> CAAGAGCGACAACGTGCCCTCCGAAGAGGTCTGAAAGAAGATGA<br/> AGAACTACTGGCGGACGCTGCTGAACGCCAAGCTGATTACCCGAA<br/> GAAAGTTCGACAATCTGACCAAGGCCGAGAGAGGGCGGCTGAGC<br/> GAACTGGATAAGGCCGGCTTTCATCAAGAGACAGCTGGTGGAAAC<br/> CCGGCAGATCACAAGACAGTGGCACAGATCCTGGACTCCCGGA<br/> TGAACACTAAGTACGACGAGAATGACAAGCTGATCCGGGAAGTGA<br/> AAGTGATCACCTGAAGTCCAAGCTGGTGTCCGATTTCCGGAAGG<br/> ATTTCCAGTTTTACAAAGTGCAGGAGATCAACAACCTACCACCAGC<br/> CCACGACGCCTACCTGAACGCCGTCTGTGGGAACCGCCCTGATCA<br/> AAAAGTACCCTAAGCTGGAAAGCGAGTTCGTGTACGGCGACTACA<br/> AGGTGTACGACGTGCGGAAGATGATCGCCAAGAGCGAGCAGGAA<br/> ATCGGCAAGGCTACCGCAAGTACTTCTTCTACAGCAACATCATG<br/> AACTTTTTCAAGACCGAGATTACCCTGGCCAACGGCGAGATCCGG<br/> AAGCGGCTCTGATCGAGACAAACGGCGAAACCGGGGAGATCGT<br/> GTGGGATAAGGGCCGGGATTTTTGCCACCGTGCAGGAAAGTGTGA<br/> GCATGCCCAAGTGAATATCGTAAAAAGACCGAGGTGCAGACAG<br/> GCGGCTTCAGCAAAGAGTCTATCCTGCCAAAGAGGAACAGCGATA<br/> AGCTGATCGCCAGAAAGAGGACTGGGACCCCTAAGAAGTACGGC<br/> GGCTTCGACAGCCCAACCGTGGCCTATTCTGTGCTGGTGGGCG<br/> CAAAGTGGAAAAAGGCAAGTCCAAGAACTGAAGAGTGTGAAAGA<br/> GCTGCTGGGGATCACCATCATGGAAAGAGCAGCTTCGAGAAGAA<br/> TCCCATCGACTTTCTGGAAGCCAAGGGCTACAAAGAAGTGAAAA<br/> GGACCTGATCATCAAGCTGCCTAAGTACTCCCTGTTCCGAGCTGGA </p> |

| No. | Name | Purpose | Generation strategy                                                                                                                                                                                                                                                                                                                                                                                                                                                                                                                                                                                                                                                                                                                                                                                                                                                                                                                                                                                                                                                                                                                                                                                                                                                                                                                                                                                                                                                                                                                                                                                                                                                                                                                                                                                                                                                                                                                                                                                                                                                                                                                                                                                                                                                                                                                                                                                                                                                                                                                                                                                                                                                                                                                                                                                                                                                                                                                                                                                                                                                                                                                                                                                                                                                                                                                                                                                                                                                                                                                                                                                                              |
|-----|------|---------|----------------------------------------------------------------------------------------------------------------------------------------------------------------------------------------------------------------------------------------------------------------------------------------------------------------------------------------------------------------------------------------------------------------------------------------------------------------------------------------------------------------------------------------------------------------------------------------------------------------------------------------------------------------------------------------------------------------------------------------------------------------------------------------------------------------------------------------------------------------------------------------------------------------------------------------------------------------------------------------------------------------------------------------------------------------------------------------------------------------------------------------------------------------------------------------------------------------------------------------------------------------------------------------------------------------------------------------------------------------------------------------------------------------------------------------------------------------------------------------------------------------------------------------------------------------------------------------------------------------------------------------------------------------------------------------------------------------------------------------------------------------------------------------------------------------------------------------------------------------------------------------------------------------------------------------------------------------------------------------------------------------------------------------------------------------------------------------------------------------------------------------------------------------------------------------------------------------------------------------------------------------------------------------------------------------------------------------------------------------------------------------------------------------------------------------------------------------------------------------------------------------------------------------------------------------------------------------------------------------------------------------------------------------------------------------------------------------------------------------------------------------------------------------------------------------------------------------------------------------------------------------------------------------------------------------------------------------------------------------------------------------------------------------------------------------------------------------------------------------------------------------------------------------------------------------------------------------------------------------------------------------------------------------------------------------------------------------------------------------------------------------------------------------------------------------------------------------------------------------------------------------------------------------------------------------------------------------------------------------------------------|
|     |      |         | <p>AAACGGCCGGAAGAGAATGCTGGCCTCTGCCGGCGAACTGCAGA<br/> AGGGAAACGAACTGGCCCTGCCCTCCAAATATGTGAACCTCCTGT<br/> ACCTGGCCAGCCACTATGAGAAGCTGAAGGGCTCCCCGAGGAT<br/> AATGAGCAGAAACAGCTGTTTGTGGAACAGCACAAGCACTACCTG<br/> GACGAGATCATCGAGCAGATCAGCGAGTTCTCCAAGAGAGTGATC<br/> CTGGCCGACGCTAATCTGGACAAAGTGTGTCCGCCTACAACAAG<br/> CACCGGGATAAGCCCATCAGAGAGCAGGCCGAGAATATCATCCA<br/> CCTGTTTACCCTGACCAATCTGGGAGCCCCTGCCGCCTTCAAGTA<br/> CTTTGACACCACCATCGACCGGAAGAGGTACACCAGCACCAAGA<br/> GGTGCTGGACGCCACCCTGATCCACCAGAGCATCACCGGCCTGT<br/> ACGAGACACGGATCGACCTGTCTCAGCTGGGAGGCACAAAAGG<br/> CCGGCGGCCACGAAAAAGGCCGgccaggcaaaaaagaaaaggGATCC<br/> TCTGAGACACCAGGCACCTCCGAGTCTGCCACCCCTGAGGGAGG<br/> AAGCGGAGGAAGCGGCTCCGTGCAGATCCCACAGAACCCCTGA<br/> TCCTGGTGGACGGCAGCTCCTACCTGTATCGGGCCTACCACGCCT<br/> TCCCACCTCTGACAACTCCGCCGGAGAGCCAACCGGAGCCATG<br/> TATGGCGTCTGAATATGCTGAGGAGCCTGATCATGACGAAG<br/> CCTACACACGCCCGCTGGTGTGGTGTGATGCCAAGGGCAAGACCTC<br/> CGCGACGAGCTGTTTGAAGCACTACAAGAGCCACAGGCCACCAAT<br/> GCCTGACGATCTGAGGGCACAGATCGAGCCACTGCACGCAATGG<br/> TGAAGGCATGGGCCTGCCTCTGCTGGCCGTGAGCGAGTGGAG<br/> GCCGACGATGTGATCGGCACACTGGCAAGGGAGGCAGAGAAGGC<br/> AGGCCGCCAGTGCTGATCTCCACCGGCCACAAGGATATGGCCC<br/> AGCTGGTGACACCAACATCACCCCTGATCAACACCATGACAAATA<br/> CCATCCTGGGCCCCGAGGAGGTGGTGAATAAGTATGGCTGCCT<br/> CCAGAGCTGATCATCGATTTCTGGCCCTGATGGGCGACTTAGC<br/> GATAACATCCCTGGCGTGCCAGGAGTGGGAGAAAAGACCGCACA<br/> GGCCCTGCTGCAGGGCCTGGGAGGCCTGGACACCCTGTACGCC<br/> GAGCCAGAGAAGATCGCCGGCCTGTCTTTAGGGGCGCCAAGAC<br/> AATGGCCGCAAGCTGGAGCAGAATAAGGAGGTGGCCTACCTGT<br/> CTTATCAGCTGGCCACAATCAAGACCGACGTGGAGCTGGAGCTGA<br/> CCTGCGAGCAGCTGGAGGTGCAGCAGCCTGCAGCAGAGGAGCTG<br/> CTGGGCCTGTTCAAGAAGTACGAGTTTAAGAGATGGACAGCCGAT<br/> GTGGAGCCGGCAAGTGGCTGCAGGCAAGGGAGCAAAAGCCAG<br/> CAGCAAAGCCACAGGAGACAAGCGTGGCAGACGAGGCACCAGAG<br/> GTGACAGCCACCGTgtag. Peptide sequence:<br/> MDYKDHGDYKDHIDYKDDDDKMAPKKRKRKVIHGVPAADKKYSI<br/> GLDIGTNSVGVAVITDEYKVPSSKFKVLGNDRHSIKKNLIGALLFDS<br/> GETAEATRLKRTARRRYTRRKNRICYLQEIFSNEMAKVDDSFHRL<br/> ESFLVEEDKKHERHPIFGNIVDEVAYHEKYPTIYHLRKLVDSTDKADL<br/> RLIYLALAHMIKFRGHFLIEGDLNPDNSVDKLFQQLVQTYNQLFEENPI<br/> NASGVDAKAILSARLSKSRLENLIAQLPGEKKNLFGNLIALLSLGTP<br/> NFKSNFDLAEDAQLSKDYYDDLDNLLAQIGDQYADLFLAAKNLSD<br/> AILLSDILRVNTEITKAPLSASMIKRYDEHHQDLTLLKALVRQQLPEKYK<br/> EIFFDQSKNGYAGYIDGGASQEEFYKFIKPILEKMDGTEELLVKNLRE<br/> DLLRKQRTFDNGSIPHQIHLGELHAILRRQEDFYPLKDNREKIEKILTF<br/> RIPYYVGLPARGNSRFAMTRKSEETITPWNFEVVDKGASAQSFIE<br/> RMTNFDKPLPNEKVLPHSLLYEFVTVYNELTKVKYVTRMRKPAFL<br/> SGEQKKAIVDLLFKTNRKVTVKQLKEDYFKKIECFDSVEISGVEDRFN<br/> ASLGTYHDLLKIKDKDFLDNEENEDILEDIVLTLTLFEDREMIERLKY<br/> AHLFDDKVMKQLKRRRYTGWGRLSRKLINGIRDKQSGKLTILDFLKSD<br/> GFANRNFMLIHDDSLTFKEDIQKAQVSGGQDLSHEHIANLAGSPAIK<br/> KGILQTVKVVDELVKVMGRHKPENIVIAMARENQTTQKGQKNSRERM<br/> KRIEEGIKELGSQILKEHPVENTQLQNEKLYLYYLQNGRDMYVDQELD<br/> INRLSDYDVDHIVPQSFLKDDSIDNKVLRSDKNRKGSDNVPSEEVVK<br/> KMKNYWRQLLNAKLITQRKFDNLTKAERGGLSELDKAGFIKRLQVET<br/> RQITKHVAQILDSRMNTKYDENDKLIREVKVITLKSXLVDFRKFQFY<br/> KVREINNYHHAHDAYLNAVVGTAALIKKYPKLESEFVYGDYKVYDVRK<br/> MIAKSEQEIGKATAKYFFYSNIMNFFKTEITLANGEIRKRLIETNGETG<br/> EIVWDKGRDFATVRKVLSPQVNVKKEVQTTGGFSKESILPKRNSD<br/> KLIARKKDWDPKKGFFSPTVAYSVLVAKVEKKGSKKLKSVKELL<br/> GITIMERSSEKPNIDFLEAKGYKEVKKDLIILPKYSLFELENGRKRML<br/> ASAGELQKGNELALPSKYVNFLLASHYEKLGSPEDNEQKQLFVEQ<br/> HKHYLDEIIEQISEFSKRVLADANLDKVL SAYNKHDRDKPIREQAENIHL<br/> FTLNLGAPAAFKYFDTTIDRKRYTSTKEVLDATLIHQSTGLYETRIIDL<br/> SQLGGDKRPAATKKAGQAKKKKGSSETPGTSESATPEGGSGSGS<br/> VQIQNPLILVDGSSYLYRAYHAFPPLTNSAGEPTGAMYGVNLMLRSL<br/> IMQYKPTHAAVVFDAKGKTRDELFEHYKSHRPPMPDDLRAQIEPLH</p> |

| No. | Name                            | Purpose                                                                                                                                                                                                                                                                                               | Generation strategy                                                                                                                                                                                                                                                   |
|-----|---------------------------------|-------------------------------------------------------------------------------------------------------------------------------------------------------------------------------------------------------------------------------------------------------------------------------------------------------|-----------------------------------------------------------------------------------------------------------------------------------------------------------------------------------------------------------------------------------------------------------------------|
|     |                                 |                                                                                                                                                                                                                                                                                                       | AMVKAMGLPLLAVSGVEADDVIGTLAREAEKAGRPVLISTGDKDMAQLVTPNITLINTMTNTILGPPEEVNKGVPPELIIDFLALMGDSSDNIPGVPVGGEKTAQALLQGLGGLDTLYAEPEKIAGLSFRGAKTMAAKLEQNKEVAYLSYQLATIKTDVELELTCEQLEVVQPPAAEELLGLFKKYEFKRWTADVEAGKWLQAKGAKPAAKPQETSVADEAPEVTATVG (Color Key: Cas9-linker-5' exo) |
| 7   | pspCas9-POLI-ST2-com-53-sp-g2   | Vector plasmid for expressing spCas9-POLI fusion protein and sgRNA targeting human DMD exon 53.                                                                                                                                                                                                       | The AflIII+Acc65I fragment of pspCas9-3'UTR-ST2-com-52-sp-g2 was used to replace that of pspCas9-POLI-tetra-com-hCLCN5-sp-g1 by restriction enzyme digestion and T4 DNA ligase.                                                                                       |
| 8   | pspCas9-Klenow-ST2-com-53-sp-g2 | Plasmid for expressing spCas9-Klenow fusion protein and sgRNA targeting human DMD exon 53.                                                                                                                                                                                                            | The AflIII+Acc65I fragment of pspCas9-3'UTR-ST2-com-52-sp-g2 was used to replace that of pspCas9-Klenow-tetra-com-hCLCN5-sp-g1 by restriction enzyme digestion and T4 DNA ligase.                                                                                     |
| 9   | pspCas9-POLI-ST2-com vector     | Vector plasmid for expressing spCas9-POLI fusion protein and sgRNA. There are two copies of HBB 3' UTR in the 3'UTR of spCas9-POLI to enhance expression. The ST2 loop of the sgRNA scaffold was replaced by com-aptamer to enable Cas9 RNP encapsulation into viral capsids via com-COM interaction. | The AflIII and Acc65I fragment of pspCas9-3'UTR-ST2-com vector was used to replace the AflIII and Acc65I fragment of pspCas9-POLI-Tetra-com vector by restriction enzyme digestion and T4 DNA ligase.                                                                 |
| 10  | pspCas9-3'UTR-ST2-com-HBB-W     | Plasmid for expressing spCas9 and wild type HBB sgRNA. The ST2 loop of the sgRNA scaffold was replaced by com-aptamer to enable Cas9 RNP encapsulation into viral capsids via com-COM interaction.                                                                                                    | The annealed HBB-W oligoes were inserted into the BbsI site of pspCas9-3'UTR-ST2-com-vector by T4 DNA ligase.                                                                                                                                                         |
| 11  | pspCas9-Klenow-ST2-com-vector   | Vector plasmid for expressing spCas9-Klenow fusion protein and sgRNA. There are two copies of HBB 3' UTR in the 3'UTR of                                                                                                                                                                              | The AflIII-Acc65I fragment containing the U6-sgRNA cassette was cut from pspCas9-poli-ST2-com vector and was inserted into the AflIII-Acc65I Sites of pspCas9-Klenow-ST2-com-53-sp-g2 by T4 DNA ligase.                                                               |

| No. | Name                         | Purpose                                                                                                                                                                          | Generation strategy                                                                                                                                |
|-----|------------------------------|----------------------------------------------------------------------------------------------------------------------------------------------------------------------------------|----------------------------------------------------------------------------------------------------------------------------------------------------|
|     |                              | spCas9-Klenow to enhance expression. The ST2 loop of the sgRNA scaffold was replaced by com-aptamer to enable Cas9 RNP encapsulation into viral capsids via com-Com interaction. |                                                                                                                                                    |
| 12  | pspCas9-Klenow-ST2-com-HBB-W | Plasmid for expressing spCas9-Klenow fusion protein and sgRNA targeting human HBB.                                                                                               | The annealed HBB oligonucleotides (HBB-sp-WF and HBB-sp-WR) were inserted into the BbsI site of pspCas9-Klenow-ST2-com-vector by T4 DNA ligase.    |
| 13  | pspCas9-3'UTR-ST2-com-DMD44  | Plasmid for expressing spCas9 and sgRNA targeting human DMD exon 44.                                                                                                             | The annealed DMD44 oligonucleotides (DMD44-g1-F and DMD44-g1-R) were inserted into the BbsI site of pspCas9-3'UTR-ST2-com-vector by T4 DNA ligase. |
| 14  | pspCas9-Klenow-ST2-com-DMD44 | Plasmid for expressing spCas9-Klenow fusion protein and sgRNA targeting human DMD exon 44.                                                                                       | The annealed DMD44 oligonucleotides were inserted into the BbsI site of pspCas9-Klenow-ST2-com-vector by T4 DNA ligase.                            |
| 15  | pspCas9-3'UTR-ST2-com-g5     | Plasmid for expressing spCas9 and sgRNA targeting human Intragenic 1 (GRCh38.p13, chromosome 20, 32752960–32752979).                                                             | Reported in CRISPR J. 2021 Dec;4(6):914-928. doi: 10.1089/crispr.2020.0106. Epub 2021 Mar 16.                                                      |
| 16  | pspCas9-Klenow-ST2-com-g5    | Plasmid for expressing spCas9-Klenow fusion protein and sgRNA targeting Intragenic 1.                                                                                            | The annealed oligonucleotides ABE-g5-F and ABE-g5-R were inserted into the BbsI site of pspCas9-Klenow-ST2-com-vector by T4 DNA ligase.            |
| 17  | pspCas9-3'UTR-ST2-com-P53    | Plasmid for expressing spCas9 and sgRNA targeting human P53.                                                                                                                     | Reported in CRISPR J. 2021 Dec;4(6):914-928. doi: 10.1089/crispr.2020.0106. Epub 2021 Mar 16.                                                      |
| 18  | pspCas9-Klenow-ST2-com-P53   | Plasmid for expressing spCas9-Klenow fusion protein and sgRNA targeting human P53.                                                                                               | The annealed P53 oligonucleotides (P53-g1F1 and P53-g1R1) were inserted into the BbsI site of pspCas9-Klenow-ST2-com-vector by T4 DNA ligase.      |

| No. | Name                                        | Purpose                                                                                                                                 | Generation strategy                                                                                                                                                                                                                                                                                                                                                                                                                                                                                                                                                       |
|-----|---------------------------------------------|-----------------------------------------------------------------------------------------------------------------------------------------|---------------------------------------------------------------------------------------------------------------------------------------------------------------------------------------------------------------------------------------------------------------------------------------------------------------------------------------------------------------------------------------------------------------------------------------------------------------------------------------------------------------------------------------------------------------------------|
| 19  | pspCas9-3'UTR-ST2-com-MRE11                 | Plasmid for expressing spCas9 and sgRNA targeting human MRE11.                                                                          | The annealed MRE11 oligonucleotides (Mre11-gF and Mre11-gR) were inserted into the BbsI site of pspCas9-3'UTR-ST2-com-vector by T4 DNA ligase.                                                                                                                                                                                                                                                                                                                                                                                                                            |
| 20  | pspCas9-Klenow-ST2-com-MRE11                | Plasmid for expressing spCas9-Klenow fusion protein and sgRNA targeting human MRE11.                                                    | The annealed MRE11 oligonucleotides were inserted into the BbsI site of pspCas9-Klenow-ST2-com-vector by T4 DNA ligase.                                                                                                                                                                                                                                                                                                                                                                                                                                                   |
| 21  | pspCas9-3'UTR-ST2-com-CtIP                  | Plasmid for expressing spCas9 and sgRNA targeting human RBBP8.                                                                          | The annealed CtIP oligonucleotides (CtIP-gF and CtIP-gR) were inserted into the BbsI site of pspCas9-3'UTR-ST2-com-vector by T4 DNA ligase.                                                                                                                                                                                                                                                                                                                                                                                                                               |
| 22  | pspCas9-Klenow-ST2-com-CtIP                 | Plasmid for expressing spCas9-Klenow fusion protein and sgRNA targeting human TBBP8.                                                    | The annealed CtIP oligonucleotides were inserted into the BbsI site of pspCas9-Klenow-ST2-com-vector by T4 DNA ligase.                                                                                                                                                                                                                                                                                                                                                                                                                                                    |
| 23  | Ppoli-CLCN5-g1                              | Plasmid for expressing <i>E. coli</i> polymerase I with nuclear targeting signals and sgRNA for <i>CLCN5</i> .                          | pspCas9-poli-Tetra-com-clcn5-sp-g1 was cut with PpuMI to delete the 2.6 kb encoding the Cas9 functional domains, and the rest DNA was self-ligated.                                                                                                                                                                                                                                                                                                                                                                                                                       |
| 24  | pspCas9-poli(D705A)-Tetra-com-clcn5-sp-g1   | Plasmid for expressing sgRNA for <i>CLCN5</i> and Cas9-pol fusion protein with D705A mutation to inactivate the polymerase activity.    | Cut pspCas9-poli-Tetra-com-clcn5-sp-g1 with Accl and NheI, and recover the vector (remove the 1 bk band); Use Pol-F1 (GCCAAGCTGAAGTCTACATATAC) and Pol-MR (CTGAGAGTAGGCGGCGGACACG) as primers and use pspCas9-poli-Tetra-com-clcn5-sp-g1 as the template to amplify a fragment of 225 bp (Fragment 1); Use Pol-MF (CGTGTCCGCGCCTACTCTCAG) and pol-R1 (aagaaagcgagctagcaatgaa) as primers and use pspCas9-poli-Tetra-com-clcn5-sp-g1 as the template to amplify a fragment of 840 bp (Fragment 2). Insert Fragment 1 and 2 into the recovered vector by Infusion reaction. |
| 25  | pspCas9-Klenow(D705A)-Tetra-com-clcn5-sp-g1 | Plasmid for expressing sgRNA for <i>CLCN5</i> and Cas9-Klenow fusion protein with D705A mutation to inactivate the polymerase activity. | The Accl-Fsel fragment of pspCas9-poli(D705A)-Tetra-com-clcn5-sp-g1 was replaced by the Accl-Fsel fragment of pspCas9-Klenow-Tetra-com-clcn5-sp-g1 to remove the 5' exonuclease coding region by T4 DNA ligase.                                                                                                                                                                                                                                                                                                                                                           |

**Supplementary Table S2. Sequence information for primers and analysis**

| Primer name              | SEQ                       | Purpose                                                            |
|--------------------------|---------------------------|--------------------------------------------------------------------|
| Reporter-F               | tccatttcaggtgtcgtgag      | To amplify the DNA in the GFP reporter cassette.                   |
| Reporter-R2              | TCCAGCTCGACCAGGATG        |                                                                    |
| HBB-F1                   | AGCCAGGGCTGGGCATAAAAG     | Used to amplify the HBB region for NGS with HBB-R3                 |
| HBB-R3                   | TGGGAAAATAGACCAATAGGCAGAG | Used to amplify the HBB region for NGS with HBB-R or HBB-R         |
| DMD53-F                  | TCCTGTTGTTTCATCATCCTAGC   | To amplify the DMD 53 exon target region for NGS                   |
| DMD53-R                  | TCCAGCCATTGTGTTGAATC      |                                                                    |
| hCLCN5-F                 | GTTTAAGGGCCCGCCTTTTG      | To amplify the CLCN5 target region for NGS                         |
| hCLCN5-R                 | TGTCTTACCTCTCGGTGCCT      |                                                                    |
| hCLCN5-F3                | GACCCAGGTTTCTTGAGCTG      | To amplify the CLCN5 target region for SMRT sequencing             |
| hCLCN5-R3                | TTCAGAGCTTCCCTCCAAGC      |                                                                    |
| OT4-F                    | CCCTATACCTGGGCTCCGTT      | To amplify the Off-target 4 region for NGS                         |
| OT4-R                    | GAAAGGGCCTCTCTTTGTAATG    |                                                                    |
| OT5-F                    | AAGCTCTACAAGGGCAGAGAATG   | To amplify the Off-target 8 region for NGS                         |
| OT5-R                    | TCAAAGCTCCCAGATTCACGTT    |                                                                    |
| OT8-F                    | CTGCTCTTTGCCTGTTGGAG      | To amplify the Off-target 8 region for NGS                         |
| OT8-R                    | GCTAAAGCTGGAAGGCTGTG      |                                                                    |
| HBD-F2                   | AAAAGGCAGGGCAGAGTCGACTG   | To amplify HBD region for NGS                                      |
| HBD-R2                   | GGTAGGAAAACAGCCCAAGGGAC   |                                                                    |
| <i>DMD44-F</i>           | CCATCACCTTCAGAACCTGA      | To amplify DMD exon 44 region for NGS                              |
| <i>DMD44-R</i>           | tcagtggttaacagaagctga     |                                                                    |
| <i>CLCN5 5' Sequence</i> | GTAGGATTCTAATCACTGCCTGCTC | Sequences used to find deletions in analyzing SMRT sequencing data |
| <i>CLCN5 3' Sequence</i> | CTTTCTGCACCTCCTGATAGCCTTG |                                                                    |
| MRE11-onF                | GCCAAGTGTGAATGTGCACA      | To amplify the on-target of for MRE11 NGS                          |
| MRE11-onR                | CCTCTTAGGCTATGACCAGGG     |                                                                    |
| Ctip-onF                 | TCATTGGGAGGCCGAACATC      | To amplify the on-target of RBBP8 for NGS                          |
| CtIP-onR                 | AAGGGCTGAAGGATGATGCA      |                                                                    |
| P53-onF                  | CTGGCATTCTGGGAGCTTCA      | To amplify the on-target of p53 for NGS                            |
| P53-onR                  | GAGACCTGTGGGAAGCGAAA      |                                                                    |
| g5-onF                   | GTCTGAGGTCACACAGTGGG      | To amplify the on-target of intragenic 1 for NGS                   |
| g5-onR                   | CTGAGAGCAGGGACCACATC      |                                                                    |
| ABE-g5-F                 | ACCGGATGAGATAATGATGAGTCA  | To make construct for expressing intragenic 1 sgRNA                |
| ABE-g5-R                 | aaacTGACTCATCATTATCTCATC  |                                                                    |
| P53-g1F1                 | ACCGCCATTGTTCAATATCGTCCG  | To make construct for expressing P53 sgRNA                         |
| P53-g1R1                 | AAACCGGACGATATTGAACAATGG  |                                                                    |
| DMD44-g1-F               | CACCGtttagcatgttccaatttc  | To make construct for expressing DMD exon 44 sgRNA                 |
| DMD44-g1-R               | AAACgagaattgggaacatgctaa  |                                                                    |
| HBB-sp-WF                | ACCGGTAACGGCAGACTTCTCCTC  |                                                                    |

|                |                            |                                                     |
|----------------|----------------------------|-----------------------------------------------------|
| HBB-sp-WR      | AAACGAGGAGAAGTCTGCCGTTAC   | To make construct for expressing <i>HBB</i> sgRNA   |
| CtlP-gF        | accgTTGCCCAAAGATTCCCCAG    | To make construct for expressing <i>RBBP8</i> sgRNA |
| CtlP-gR        | aaacCTGGGGAATCTTTGGGCAA    |                                                     |
| Mre11-gF       | accgTGACTGAGATCTGAGTGCTC   | To make construct for expressing <i>MRE11</i> sgRNA |
| Mre11-gR       | aaacGAGCACTCAGATCTCAGTCA   |                                                     |
| 53-sp-g2-F     | ACCGactggttgccctccggttctga | To make construct for expressing DMD exon 53 sgRNA  |
| 53-sp-g2-R     | AAACtcagaaccggaggcaacagt   |                                                     |
| hCLCN5-sp-g1-F | ACCGGAGGACAAGTCGTACAATGG   | To make construct for expressing <i>CLCN5</i> sgRNA |
| hCLCN5-sp-g1-R | AAACCCATTGTACGACTTGTCTTC   |                                                     |

**Supplementary Table S3. Single guide RNA target sequences**

| Name                            | Protospacer          | PAM |
|---------------------------------|----------------------|-----|
| <b><i>CLCN5</i></b>             | GAGGACAAGTCGTACAATGG | TGG |
| <b><i>DMD53</i></b>             | ACTGTTGCCTCCGTTCTGA  | AGG |
| <b><i>DMD44</i></b>             | TTAGCATGTCCCAATTCTC  | AGG |
| <b><i>HBB</i></b>               | GTAACGGCAGACTTCTCCTC | AGG |
| <b><i>Intragenic site 1</i></b> | GATGAGATAATGATGAGTCA | GGG |
| <b><i>P53</i></b>               | CCATTGTTCAATATCGTCCG | GGG |
| <b><i>MRE11</i></b>             | TGACTGAGATCTGAGTGCTC | TGG |
| <b><i>RBBP8</i></b>             | TTGCCCAAAGATTCCCCAG  | GGG |

**Supplementary Table S4. Overall INDEL rates of co-targeted genes**

|                    | <i>RBBP8/CLCN5</i> |              |
|--------------------|--------------------|--------------|
|                    | <i>RBBP8</i>       | <i>CLCN5</i> |
| <b>Cas9</b>        | 48.9 ± 1.9         | 42.4 ± 1.9   |
| <b>Cas9-Klenow</b> | 1.7 ± 0.03         | 1.1 ± 0.17   |

Replicate number is three for all groups. No difference in INDEL rates was observed for co-transfected genes.
